# Supplementary material for: Agonist-specific voltage-dependent gating of lysosomal two-pore Na+ channels
Source: eLife. 2019 Dec 11;8:e51423. doi: 10.7554/eLife.51423 (PMC6905855; doi:10.7554/eLife.51423)
Supplement: Figure 1—figure supplement 2—source data 1. [file elife-51423-fig1-figsupp2-data1.xlsx]

## Sheet: Sheet1
Fig. 1-Suppl. 2B Representative time course of LyNa-VA1.2- induced ITPC2								Fig. 1-Suppl. 2C Latency of LyNa-VA1.2 (200 µM)-induced ITPC2
time(s)	I/o	wc	EL					Latency(s)
0	-0.06927	-0.02373	-0.016					whole cell	inside out	lysosome
2	-0.0966	-0.02853	-0.01474					14	8	6
4	-0.00941	-0.024	-0.01598					14	12	8
6	-0.000848595	-0.02111	-0.00988					12	14	6
8	-0.06407	-0.02193	-0.00688					20	14	10
10	-0.08365	-0.01987	-0.02054							8
12	-0.08538	-0.0181	-0.02108
14	-0.09864	-0.01154	-0.10888
16	-0.09741	-0.000779449	-0.19836
18	-0.12841	-0.01449	-0.25066
20	-0.25985	-0.01685	-0.3079					Fig. 1-Suppl. 2D Time constant (τ) of LyNa-VA1.2 (200 µM)-induced ITPC2
22	-0.38741	-0.0503	-0.56109					Tau(s)
24	-0.51008	-0.06829	-0.70921					whole cell	inside out	lysosome
26	-0.53996	-0.13557	-0.82406					55	13.9	6.38
28	-0.50437	-0.1797	-0.85786					48	16.3	6
30	-0.60461	-0.20048	-0.85771					30.1	17.9	5.4
32	-0.6923	-0.28054	-0.9123					39.1	21.3	15.2
34	-0.8892	-0.3854	-1.00013
36	-0.75399	-0.43806	-0.97187
38	-0.80742	-0.42235	-0.99234
40	-0.7387	-0.51935	-0.98679
42	-0.87941	-0.55695	-0.98899
44	-0.99372	-0.63243
46	-1.00022	-0.72572
48	-0.95548	-0.7464
50	-0.92112	-0.83252
52	-0.87003	-0.84185
54		-0.89317
56		-0.92767
58		-0.95606
60		-0.96662
62		-0.99655
64		-0.97484
66		-1.0004
