# Supplementary material for: Agonist-specific voltage-dependent gating of lysosomal two-pore Na+ channels
Source: eLife. 2019 Dec 11;8:e51423. doi: 10.7554/eLife.51423 (PMC6905855; doi:10.7554/eLife.51423)
Supplement: Figure 1—source data 1. [file elife-51423-fig1-data1.xlsx]

## Sheet: Fig1A
Fig. 1A High- throughput screening of the LOPAC library with Fluo-4 Ca2+ imaging
Sample Name	3 nM	15 nM	74 nM	370 nM	1.84 uM	9.2 uM	46 uM	46 uM (replicate)
Doxylamine succinate	2.7	2	2.4	1.9	5.5	0	-0.9	1.2
A-315456	3.5	3.6	4	3.4	3.5	-0.7	-0.8	2.8
S(-)-UH-301 hydrochloride	2.8	1.4	1.6	1.7	2.3	1.1	-0.7	0.4
(±)-PPHT hydrochloride	2.3	1.4	1.4	2.2	3.5	0.8	-0.5	1
Phenoxybenzamine hydrochloride	2.4	1.5	0.8	3	1.3	0.4	-0.5	2.9
Oxybutynin chloride	3.4	3.9	1.6	3.4	2.2	1.5	-0.5	2.6
TBB	3.5	2.3	1.4	2.6	1.6	0.5	-0.5	0.1
Dihydroouabain	3.1	2.9	2	1.5	2.7	1.8	-0.4	1.9
SKF 95282 dimaleate	1.8	1.2	1.9	2.2	0.6	1.2	-0.3	31.6
Trequinsin hydrochloride	3	1.9	1	1.8	1.4	0.6	-0.3	3.4
Lonidamine	3.4	0.5	2	1.8	2.5	1.1	-0.3	3.9
cis(+/-)-8-OH-PBZI hydrobromide	5	2.2	2.7	4	3.3	-0.4	-0.3	0.4
GBR-12935	2.7	2.9	1.4	4	3	-0.5	-0.2	9.5
Loxapine succinate	2.8	1.7	1.7	1	4	1.4	-0.2	0.6
Diazoxide	0	2.8	1.3	1.2	3.9	0.4	-0.2	0.5
Felodipine	3.2	2.4	1.3	1.5	2.5	1.5	-0.2	3.5
Biperiden	3.3	1	2.8	2	2.8	2	-0.2	3.1
(±)-Butaclamol hydrochloride	3.5	1.1	2.1	1.9	3.8	2.9	-0.2	2.9
Doxycycline	5.8	1	1.7	1.7	5.5	0.8	-0.2	-0.3
G-Strophanthin	2.3	2.3	2.5	2	2.2	0.8	-0.1	1.3
ML-9	2.4	1.3	0.4	1.2	3	-0.8	-0.1	4
PRE-084	2.6	1.6	0.6	1.5	1.8	-0.4	-0.1	2.4
Nemadipine-A	3.5	2.4	2.4	1.9	3	4.1	-0.1	1.1
(+)-Butaclamol hydrochloride	3.5	4.5	1.4	4.2	3.5	2.2	-0.1	-0.7
PD-128907	4	2.5	3.6	2.4	4.1	-0.2	-0.1	1.3
GABA	4	1.3	1.7	1.1	4.3	1	-0.1	1.3
YM 976	6.9	2.6	4.7	5.4	5.8	0.5	-0.1	0.1
GW-7647	3	0.9	1.2	1.5	5.9	0.2	0	-0.3
Cambinol	8.2	3.4	6	4.1	5.2	0.8	0	-0.6
Quinine	3.7	2.4	4.6	4	3.5	0.1	0	0.2
(-)-Gossypol	0.9	1.1	1.2	0.8	2.5	0.5	0	108.5
NS8593 hydrochloride	3.7	3.1	1.7	2	3.6	-0.2	0	2.7
PK-11195	3.7	2.2	2.2	2.7	3.7	1.1	0	0.6
Nisoxetine hydrochloride	4.3	3.7	3.6	2.2	1.5	-0.4	0	3.5
Methapyrilene hydrochloride	5	2.8	4.1	3.3	3	0.8	0	1.8
Etodolac	2	0.6	0.9	1.3	3.5	0.5	0.1	3.7
L-687,384 hydrochloride	1.6	2.1	1.4	2	3	1.8	0.1	14.9
XCT-790	5.2	4.1	2.2	5.3	4.2	0.1	0.1	1.8
DL-alpha-Methyl-p-tyrosine	6.5	0	2.1	1.5	2.5	0.3	0.1	2
PD-128907	1.9	1.3	1	3.3	4.8	0.5	0.2	0.3
Roscovitine	4	1.8	1.8	1.6	1.7	1.6	0.2	0.7
Tetrabenazine	4.2	2.5	1.6	1.9	2.7	-0.6	0.2	0.5
PNU-37883A	4.5	3	3.5	3.4	4.6	-0.3	0.2	4.5
Pergolide methanesulfonate	4.6	2.3	4.4	3.1	4	1.6	0.2	0.9
Imidazole-4-acetic acid hydrochloride	2.4	1.8	0.4	1.6	5.3	-0.8	0.3	-0.5
Pyrocatechol	5.5	1	3.7	0.7	6.1	3	0.3	7
(+)-Nicotine (+)-di-p-toluoyl tartrate	1.5	1.6	0.7	1.1	2.1	-0.8	0.3	0
NS 521 oxalate	1.1	0.4	1	2.1	3.1	0.7	0.3	0.3
1,3,5-tris(4-hydroxyphenyl)-4-propyl-1H-pyrazole	2.4	1.6	2	1.5	4.9	-0.5	0.3	0.7
Caffeic acid	2.7	0.8	1.4	1.8	2.5	-0.5	0.3	-0.8
Flunarizine hydrochloride	3	1.9	1.8	1.5	3.7	2.7	0.3	2.2
JFD00244	3	3.3	3	3.9	2.3	0.5	0.3	-0.7
Clemizole hydrochloride	4	2.4	2.3	2.3	3.2	2.3	0.3	-0.1
Dihydroergocristine methanesulfonate	-0.1	0.2	0	0.3	-0.2	0.3	0.4	0.2
Quinidine sulfate	2.2	1.5	1.3	2.3	1.3	1.8	0.4	3.3
Debrisoquin sulfate	0.2	0.4	0.3	0.1	7.8	0.6	0.4	0.4
Psora-4	2.3	3.3	2.1	2.9	3.4	2.1	0.4	0.8
N-(4-Amino-2-chlorophenyl)phthalimide	2.7	1.2	2.5	3.5	2.3	0.4	0.4	0.2
McN-A-343	2.8	1.8	2.6	2	3.9	0.2	0.4	0
Carbetapentane citrate	2.9	0.7	0.9	2.3	0.7	2.6	0.4	5.9
Calmidazolium chloride	3.2	3.6	4.5	2.6	6.8	0.4	0.4	0.8
5-(N-Ethyl-N-isopropyl)amiloride	3.4	1.7	2.7	2.3	1.6	0.9	0.4	1.5
Tracazolate	4.8	3.6	5.8	4.3	5.9	0.2	0.4	0.5
8-Bromo-cGMP sodium	2.2	0.2	0.8	1.4	2.2	-0.3	0.5	0.4
Quipazine, 6-nitro-, maleate	2.6	2	1.5	2.2	2	0.6	0.5	1.1
SANT-1	2.2	2.4	1.4	2.1	2.8	0.2	0.5	2.3
Trandolapril	2.2	1.6	0.9	1.4	2.4	-0.8	0.5	2.9
( R)-(+)-WIN 55,212-2 mesylate	2.5	1.7	1.3	3.8	2.7	-0.8	0.5	5.3
Fenretinide	2.7	2.7	1.6	2.5	4.3	0.8	0.5	1.3
JWH-015	2.9	2.4	2.7	1.8	2.4	1.5	0.5	4.8
L-703,606 oxalate salt hydrate	3.2	3.2	2.7	1.4	1.6	2.1	0.5	45.4
(+)-Chlorpheniramine maleate	3.4	3.1	2.2	2	2.3	2	0.5	7.1
Felbamate	3.5	1.7	1.4	1.1	2.1	-0.4	0.5	-0.2
Histamine, R(-)-alpha-methyl-, dihydrochloride	4	2.4	3.4	1.5	2.1	0.8	0.5	0
Dilazep hydrochloride	2.5	1.1	1.1	1.7	2.9	0.1	0.6	3.9
CBIQ	2.9	3.1	3.1	2.4	6.8	3	0.6	6.8
1-Aminocyclopropanecarboxylic acid hydrochloride	1.7	2.2	1.6	2.9	1.6	-0.1	0.6	-0.1
7-Nitroindazole	2.2	3.5	0.7	2.1	2.3	-0.5	0.6	0.4
L-NAME	2.5	1.4	0.6	0.3	2.6	1.1	0.6	-0.9
Cibenzoline succinate	2.5	1.2	1.1	1.7	2.6	-0.9	0.6	0.9
(±) trans-U-50488 methanesulfonate	2.5	1.9	1	1.1	1.3	2	0.6	7.1
BWB70C	2.8	2.5	2.9	2.6	2.6	-0.7	0.6	0
Nefiracetam	2.8	2.7	1.9	1.9	3.5	-0.7	0.6	0.1
Opipramol dihydrochloride	2.9	1.7	1.8	2.4	5.4	1.4	0.6	8
3,7-Dimethyl-1-propargylxanthine	2.9	2.9	2.6	2.5	3.9	0	0.6	2.8
NU-6027	3.5	0.7	2	3.3	3.2	1.2	0.6	0.4
Leflunomide	3.6	2.6	0.7	1.5	3.7	3.9	0.6	7.5
Hexahydro-sila-difenidol hydrochloride, p-fluoro analog	3.6	1.1	1.3	1.6	1.9	-0.4	0.6	50.4
N-(2-[4-(4-Chlorophenyl)piperazin-1-yl]ethyl)-3-methoxybenzamide	3.6	1.3	0.8	1.2	2.1	0.1	0.6	3.5
JX-401	3.8	2.8	3.1	3.7	2.8	2.2	0.6	2.5
Pregnenolone sulfate sodium	4.7	1.5	0.5	1.9	4.5	2	0.6	1
(±)-Vesamicol hydrochloride	4.9	1.8	2	1.3	2.3	0.9	0.6	0.8
Cephradine	2	1	1.9	2.1	2.8	-0.5	0.7	-0.8
2,3-Butanedione monoxime	0.5	0.5	1.2	0.6	0.7	1.4	0.7	0.5
DL-Thiorphan	4.8	1.8	4.7	2.1	6.4	0.1	0.7	0.4
Xylazine hydrochloride	2.1	1	1.3	1.4	2.6	-0.4	0.7	-0.4
NO-711 hydrochloride	4.3	2.6	1.3	2.3	5.6	-0.1	0.7	0.9
N,N,N-trimethyl-1-(4-trans-stilbenoxy)-2-propylammonium iodide	6	1	1.5	3.6	2.2	-0.1	0.7	3
(+)-Brompheniramine maleate	1.2	1.4	0.9	2.3	2.4	1.3	0.7	1.7
(+)-Cyclazocine	2.5	2.3	1.6	2.6	1.3	0.1	0.7	1.7
Phenylbenzene-omega-phosphono-alpha-amino acid	2.7	1.5	1.2	2.1	3.1	0	0.7	1.2
(S)-MAP4 hydrochloride	3.2	2.3	2.3	2.6	2.5	-1	0.7	-0.9
(±)-6-Chloro-PB hydrobromide	3.2	2	1.7	4.7	2.4	-0.7	0.7	2.7
Propofol	3.5	3	4.5	3.4	4.7	0.1	0.7	0.7
S-(+)-PD 123177 trifluoroacetate salt hydrate	2.8	0.8	1.1	1.1	2.1	0	0.8	-0.8
3-n-Propylxanthine	3.4	2.6	1.6	2.4	4.2	-0.6	0.8	-0.4
MDL 28170	4.1	3.1	0.4	2.5	5.3	1.4	0.8	1.5
YS-035 hydrochloride	2.9	4.2	1.2	4.1	4.1	-0.8	0.8	-0.6
Diphenhydramine hydrochloride	1	4.6	2.1	1.7	1.8	0.6	0.8	6.9
N-Succinyl-L-proline	1.6	1.4	0.6	1.7	4.7	0.5	0.8	0.2
(+)-Norfenfluramine hydrochloride	2.3	1.9	1.4	1.2	2.9	-0.5	0.8	1.3
Lidocaine hydrochloride	2.5	1.5	2.9	1.9	4.1	-0.7	0.8	-0.2
SB-202190	2.5	2.4	2.1	2.2	4.6	3.3	0.8	3
VER-3323 hemifumarate salt	2.7	3.1	1.7	2.5	7.3	2.6	0.8	96.1
MRS 1523	2.9	3.8	3.4	3.8	5.4	1.2	0.8	1.8
Pirfenidone	2.9	1.7	1.9	2.3	2.5	-0.7	0.8	-0.7
Synephrine	4.9	0.9	2.9	2.3	1.5	-0.7	0.8	2.1
Diacylglycerol Kinase Inhibitor II	3	1.8	2.8	1.5	2.6	-0.1	0.9	0.7
Venlafaxine hydrochloride	3.3	2.7	1.6	1.8	3.5	0.1	0.9	0.8
CI-976	1.7	1.8	2.1	2.4	5.3	0.7	0.9	0.2
R-(+)-8-Hydroxy-DPAT hydrobromide	1.8	3	0.6	2.9	4.8	1.1	0.9	2
(6R)-5,6,7,8-Tetrahydro-L-biopterin hydrochloride	1.9	1.1	1.4	2	2.4	-1	0.9	-0.8
Thio-L-citrulline	2.5	1.1	1.4	1.3	1.8	-1.1	0.9	0.1
3-Nitropropionic acid	2.5	2.2	1.4	1.7	2.1	-0.4	0.9	-0.8
Lidocaine N-ethyl bromide quaternary salt	2.6	1.3	2.7	2.7	2.2	0.5	0.9	-0.2
SKF 75670 hydrobromide	2.8	1.4	1.1	2	3.2	-0.5	0.9	2.9
Tyrphostin AG 537	2.8	2.3	2.2	2.5	4.3	-0.3	0.9	-0.5
SKF 83959 hydrobromide	3	2.2	2.1	2.6	2.2	1.1	0.9	3.8
SKF-525A hydrochloride	3	2.8	2.9	3.9	4.3	-0.4	0.9	4.1
Acetylthiocholine chloride	3	2.4	4	2.4	5.4	-0.1	0.9	3.8
(-)-Cotinine	3.3	1.3	2	2.4	1.6	-0.1	0.9	0.1
Moxisylyte hydrochloride	3.6	2	0.9	2.1	1.6	-0.6	0.9	0.6
1-Deoxynojirimycin hydrochloride	4	2.2	1.1	2.7	4.9	0.1	0.9	0.1
Dihydro-beta-erythroidine hydrobromide	6	4	4.6	5.6	7.5	0.3	0.9	3.6
A-77636 hydrochloride	1.8	1.8	1.7	2.8	6.3	-0.2	1	1.7
(±)-3-(3,4-dihydroxyphenyl)-2-methyl-DL-alanine	2.5	1.3	0.8	0.9	2.5	0	1	1.7
AIDA	3	1.2	2.5	2.7	3.2	0.1	1	0
Methoxamine hydrochloride	2.8	1.3	1.3	2	2.1	0	1	2.5
Z-L-Phe chloromethyl ketone	1.4	0.1	1.4	0.7	5.2	0.2	1	1.8
DSP-4 hydrochloride	1.9	2.6	2.6	2.3	4.4	-0.5	1	0.2
Glybenclamide	3.5	2.9	2.1	2.7	5.4	0.5	1	0.6
Thiolactomycin	2.5	1.4	1.9	0.6	3.3	-0.5	1	-0.1
Fusaric acid	2.6	1.8	1.1	2.1	2.2	-0.7	1	0
Aspirin	2.9	1.9	4.8	2.9	4.6	0.3	1	-0.8
nor-Binaltorphimine	3	1.3	2.7	1.9	2.6	1	1	0
Acetazolamide	3.2	1.6	1.3	4.4	3.8	0	1	1
Serotonin hydrochloride	3.3	2	1.4	1.6	3.3	0.5	1	1.3
AMN082	3.6	3.6	3	3	3	1.4	1	2.9
Picrotoxin	3.6	1.9	2.2	1.4	3.8	-0.5	1	1.4
DBO-83	4.2	2.4	3.1	3.2	5.2	-0.4	1	1.4
Cinnarizine	4.4	1.1	0.9	4.2	3.2	0.1	1	-0.8
Harmane	4.6	1.7	1.9	2	2.7	-0.4	1	3.8
ATPA	2.9	1.5	3.5	2.8	4	0.1	1.1	-1.1
L-Glutamic acid hydrochloride	2.4	1.4	0.7	2	3	-0.3	1.1	9.1
Tyrphostin AG 112	3.6	2.4	5.7	2.1	5.6	4.4	1.1	11.7
Enoximone	0.7	2	3.3	4.5	3.3	0.1	1.1	3
Chloro-IB-MECA	0.2	1.5	0	1.9	3.5	0.9	1.1	0
(±)-Chloro-APB hydrobromide	2.3	3.1	2.2	5.5	3.9	3.5	1.1	4.2
Cefotaxime sodium	2.7	2.4	2.6	2.8	4.4	-0.7	1.1	2.3
3-Tropanylindole-3-carboxylate methiodide	2.9	0.5	-0.4	2.6	1.5	-0.8	1.1	-0.3
Meloxicam sodium	2.9	2.2	2.2	3.1	2.4	-0.2	1.1	1
CGP 20712A methanesulfonate	3.2	2.1	1.8	2	3.2	0	1.1	0.1
ICI 63,137	3.3	0.4	0.9	1.8	2.2	-0.7	1.1	0.3
Sodium Oxamate	3.4	1.8	2.8	2.6	3.5	-0.3	1.1	1
S(+)-Raclopride L-tartrate	3.4	2.2	1.9	1.5	1.9	-0.7	1.1	-0.7
U-99194A maleate	3.4	1.8	1.8	1.9	7.1	0.8	1.1	0.9
IPA-3	6.5	1.6	1.5	2.6	1.9	-0.7	1.1	-0.4
Pimagedine	3.5	2.3	2.8	1.5	4.9	-0.2	1.2	1.2
BAY 61-3606 hydrochloride hydrate	1.6	0.9	1	2	2.7	0.1	1.2	1.5
alpha,beta-Methylene adenosine 5'-triphosphate dilithium	2	3.3	2.9	2.5	4.5	0.5	1.2	-0.4
cis-(Z)-Flupenthixol dihydrochloride	2.1	0.9	0.8	1.9	3.5	-0.5	1.2	10.1
Neostigmine bromide	2.7	1.3	2.2	5.7	2.3	-0.4	1.2	0.9
Wortmannin from Penicillium funiculosum	2.9	2.1	1.3	2.9	2.6	0.3	1.2	2.4
Ranitidine hydrochloride	3	1.6	1.9	3	3.2	-0.1	1.2	0.5
Vincristine sulfate	3.1	2.8	1.3	1	5.1	0	1.2	0.2
Fiduxosin hydrochloride	3.1	1.4	1.8	1.9	1.1	1.1	1.2	0.3
Guanabenz acetate	3.1	2.3	3.2	3.4	1.6	-0.6	1.2	24.8
N-Methylhistaprodifen dioxalate salt	3.3	2.3	2	2.6	3.7	-0.4	1.2	0.4
Hydroxytacrine maleate	3.3	3	2.8	2.6	3.4	-0.3	1.2	0.3
Picotamide	3.4	1.8	1.9	2.5	2.7	-0.5	1.2	1.1
R(+)-6-Bromo-APB hydrobromide	3.4	3.2	3.5	2.3	3.6	3.4	1.2	3.4
Tetramisole hydrochloride	3.9	1.2	0.9	2.7	2.7	-0.9	1.2	0
Niflumic acid	4	1.8	1	1.3	0.9	2.3	1.2	2.1
Mevastatin	4	2.4	3.2	2.8	3.8	-0.3	1.2	7.1
HEMADO	5	2.2	2.5	2.1	3.2	0.9	1.2	8.7
D-609 potassium	5.5	2.4	2.3	1.3	3.4	-1.1	1.2	2.7
CB 1954	2.7	1.9	3.4	2.2	5.3	2	1.3	2.1
Zonisamide sodium	2.2	0.7	3.1	2	3.9	1	1.3	1.9
Caffeic acid phenethyl ester	3.6	2.4	2.3	2.9	4.1	-0.9	1.3	5.5
Ro 90-7501	3.9	2.3	2.2	1.9	4.4	0.6	1.3	0.3
Corticosterone	3.6	3	1	2.9	3.9	1.7	1.3	3
1-[2-(Trifluoromethyl)phenyl]imidazole	2.2	1.2	1.5	1.8	3.9	1.1	1.3	0.3
CPCCOEt	3.5	2.3	3.7	1.2	5.4	3.7	1.3	15.1
Podophyllotoxin	2.1	2.1	2	0.6	2.1	2.1	1.3	8.6
4-Amidinophenylmethanesulfonyl fluoride hydrochloride	2.5	1.2	1.5	0.9	2.5	-0.3	1.3	17.3
Sodium nitroprusside dihydrate	2.6	1.7	2.2	2.4	3.3	0.1	1.3	0.9
NS-1619	2.8	2.7	2.4	2.1	3.4	8.8	1.3	33.8
Pentamidine isethionate	2.9	1.8	2.2	1.7	2	-0.3	1.3	-0.1
Prilocaine hydrochloride	3	2.5	1.4	1.3	2.3	-0.6	1.3	0
Naltriben methanesulfonate	3	4.9	2.7	1.9	2.3	-0.6	1.3	4.6
SCH-202676 hydrobromide	3.1	3.4	2.3	2.3	4.3	-0.4	1.3	2
Amiprilose hydrochloride	3.2	3.7	3.6	2.1	3.3	-0.2	1.3	1.5
Aminobenztropine	3.5	2.2	1.8	2.1	1.6	1.2	1.3	7.5
Cyclobenzaprine hydrochloride	3.8	3.1	2.7	4	2.4	-0.6	1.3	41.6
Famotidine	3.9	2.1	3.7	2.4	6.9	0.7	1.3	7.6
Bepridil	4	3.1	2.3	2.3	3.2	-0.1	1.3	0.6
1,10-Phenanthroline monohydrate	4	3.4	3.6	2	4.5	-0.2	1.3	0.6
Metolazone	4.4	1.8	3.3	3.1	4.3	-0.5	1.3	0
Benztropine mesylate	4.7	3.9	3.7	3.8	3.4	0.8	1.3	2.6
K 185	5.2	6.5	2.8	3.7	3.9	4.5	1.3	5.3
1,4-Dideoxy-1,4-imino-D-arabinitol	7.7	2.4	1.9	2.5	2.9	-0.1	1.3	0.3
7-Cyclopentyl-5-(4-phenoxy)phenyl-7H-pyrrolo[2,3-d]pyrimidin-4-ylamine	4.7	1.8	4.6	2.2	4.7	0.2	1.4	1.9
Noscapine hydrchloride	3.7	2.4	2.9	1.9	3.8	1.1	1.4	2.8
(±)-Normetanephrine hydrochloride	2	0.9	1.2	2	3.8	1.4	1.4	0
Suramin	2.1	3.5	2.5	3.9	3.1	-0.5	1.4	1.2
Vinblastine sulfate salt	2.3	2	4.7	0.5	3.8	-0.3	1.4	0.5
Melphalan	2.5	2.7	1.9	2.5	2.6	-0.4	1.4	1.8
MG 624	2.5	2.1	1.2	2.4	1.9	0.4	1.4	3.1
(-)-Nicotine hydrogen tartrate salt	2.6	1.1	1.4	1.7	4.5	0.3	1.4	4.9
R(-)-2,10,11-Trihydroxyaporphine hybrobromide	2.7	2.8	2.8	1.8	2.9	0.4	1.4	1.5
Lamotrigine	2.7	2.5	1.4	2.1	3.1	-0.4	1.4	1.5
(±)-p-Chlorophenylalanine	2.8	1.4	2	1.5	2	-0.3	1.4	0.6
(±)-gamma-Vinyl GABA	2.8	1.6	0.6	3.1	3.2	0.7	1.4	0.1
Doxifluridine	2.8	1.6	1.9	2.2	3.8	-0.7	1.4	-0.6
Ritanserin	2.9	1.7	2.5	2.7	2.2	-0.4	1.4	22.5
Nalidixic acid sodium	2.9	1	1.5	2.7	2.6	-0.7	1.4	0.4
DPO-1	2.9	3	2.7	1.9	0.2	5.3	1.4	2.3
CR 2249	3.2	2.1	2.1	3.3	3.3	0.3	1.4	1.6
BRL 54443 maleate	3.2	2.7	3	2.6	2.3	0.5	1.4	-0.1
8-(p-Sulfophenyl)theophylline	3.4	1.4	3.5	2.1	4.1	-0.1	1.4	0.3
LE 300	3.4	1.8	3	3.1	3.9	-0.8	1.4	1.2
MK-886	3.7	2.6	2.7	1.8	2.7	1.9	1.4	23.6
N-Acetyl-5-hydroxytryptamine	3.8	2.6	1.9	2.2	3	-0.2	1.4	0.8
Cortisone acetate	4.5	3.3	2.7	2.6	5.1	1	1.4	2.6
Genipin	4.7	1.7	1.2	3	3.7	0	1.4	0.2
3-Bromo-7-nitroindazole	4.7	4.5	2.2	3.6	3.8	0.3	1.4	4.9
Amiodarone hydrochloride	4.9	1.9	1.9	2.7	2.6	-0.7	1.4	1
Diacylglycerol kinase inhibitor I	8.3	2.1	4	2	6	-0.4	1.4	8.1
1,1-Dimethyl-4-phenyl-piperazinium iodide	1.1	2.7	2.6	3.3	6	2.1	1.5	3.1
L-tetramisol	3.3	3.3	2.7	2.3	3.2	0.3	1.5	0.6
Tyrphostin 23	3.2	3.1	1.7	3.1	4.5	0.8	1.5	3.1
L-Glutamine	5.8	1.8	1.9	2.4	6.9	0.7	1.5	1.7
Trazodone hydrochloride	3.8	2.9	3	1.9	4.4	1.8	1.5	16.3
Cyclothiazide	0.4	0.5	2.2	0.6	4.5	6.7	1.5	0
Chelidamic acid	1.6	2	1.1	2.1	3.9	-0.3	1.5	-0.4
Paliperidone	1.9	2.3	1.5	2.5	5.4	0.4	1.5	8.4
Naloxone hydrochloride	2	1.5	3	1.3	3.2	0	1.5	1.2
Clofibrate	2	2.3	1.9	2.8	4.7	-0.3	1.5	1.4
UK 14,304	2.3	3.4	2.6	2.2	7	2.9	1.5	4.1
U-73122	2.7	1.5	1.4	2.3	2	-0.8	1.5	0
(±)-threo-1-Phenyl-2-decanoylamino-3-morpholino-1-propanol hydrochloride	2.8	4.6	1.5	4.3	2.7	-0.3	1.5	26.5
Olvanil	2.8	2.1	1.8	2.2	5	1	1.5	1.4
1-(1-Naphthyl)piperazine hydrochloride	2.9	3.7	2.2	4.6	3.6	-1.1	1.5	11.6
Uridine 5'-diphosphate sodium	3	1.4	1.4	2.4	1.9	0	1.5	1.4
1-Amino-1-cyclohexanecarboxylic acid hydrochloride	3.2	2.9	1.6	1.8	5.1	-0.7	1.5	-0.2
GYKI-52466	3.2	2.6	0.6	3.4	3.5	0.1	1.5	4.7
Cilnidipine	3.4	4.2	3.5	2.4	3.5	0.4	1.5	-0.4
Hispidin	3.4	1.3	0.5	2	2.7	-0.7	1.5	15.9
Chloroethylclonidine dihydrochloride	3.7	2.8	2.2	2.6	3.3	0	1.5	0.4
Levallorphan tartrate	3.8	3.2	3.9	3.1	3.9	-0.5	1.5	8.9
DL-Cycloserine	3.8	2.3	2.5	1.8	6	0.4	1.5	2.4
Pirenperone	3.8	1.6	1.9	2.2	2.2	-0.3	1.5	4.7
U-62066	3.9	3.4	1.5	1.7	2.9	-0.8	1.5	8.6
(-)-Scopolamine hydrobromide	4.1	2.1	1.6	2.8	3.7	0.5	1.5	2.1
L-165041	4.3	2.9	2.5	2.4	4.1	-0.4	1.5	2.5
Spermine tetrahydrochloride	5	2.1	4	3.6	3.5	-0.6	1.5	-0.6
BRL-15572	5.3	3.3	2.4	3.5	6.1	0	1.5	-0.8
Ganciclovir	2.7	1.5	2.3	2.3	4.2	-0.5	1.6	0.7
Imipenem monohydrate	2.9	1.5	0.9	1.3	4.5	0.4	1.6	0.5
MRS 2159	3.3	3.7	2.1	2	3.3	0.1	1.6	1.7
Emetine	3.8	0.9	7.2	2.7	6.3	5.5	1.6	12.3
Mitoxantrone	3.3	2.1	2.3	2.4	2.9	0.3	1.6	1.2
Iodoacetamide	3.9	2.3	2.9	3.9	3.9	0.6	1.6	-0.4
Centrophenoxine hydrochloride	3.1	1.9	1.5	2.3	3.7	0.8	1.6	0.2
Metolazone	2.1	1.7	2.1	2	4.4	4.7	1.6	0.2
GR 55562 dihydrobromide	9.5	2.1	4.5	1.6	7.4	3.6	1.6	15.4
A-134974 dihydrochloride hydrate	1.8	0.8	0.5	2.4	2.4	-0.6	1.6	0.1
loxoprofen	1.9	1.9	1.5	2.7	3.4	-0.2	1.6	-0.4
Cystamine dihydrochloride	2.4	1.6	1.3	1.7	3.6	0.3	1.6	1.4
8-Cyclopentyl-1,3-dimethylxanthine	2.6	3.6	0.8	2.9	3.2	0.5	1.6	2.7
I-OMe-Tyrphostin AG 538	2.6	3.7	0.9	1.1	2.5	0.3	1.6	4.9
(+)-Hydrastine	2.7	2.8	1.1	0.8	0.1	3.5	1.6	3.6
Levetiracetam	2.8	1.1	1	1.8	2.3	-0.5	1.6	0.8
Amifostine	3	2.3	1.9	2.2	6	0.4	1.6	3.5
ZM-39923	3.1	0.8	1.3	1.8	2.5	-0.4	1.6	0.4
Meclofenamic acid sodium	3.1	0.9	0.9	1.6	3.7	2.3	1.6	4.6
L-701,324	3.2	1.2	1.7	1.9	4.1	0.4	1.6	0.8
Pentolinium di[L(+)-tartrate]	3.3	2.6	1.2	1.5	2	-0.3	1.6	-0.2
Riluzole	3.3	2	3	4.1	4.6	0	1.6	5.7
4-Imidazolemethanol hydrochloride	3.3	3.1	1.2	2.2	1.1	-0.5	1.6	0.3
(-)-trans-(1S,2S)-U-50488 hydrochloride	3.5	2.9	2.4	2.2	2.7	3.2	1.6	16.9
CL 316,243	3.6	2.4	1.3	3.2	3.6	0.3	1.6	1.5
Cetirizine hydrochloride	3.6	2.9	2.3	2.1	3.1	0.5	1.6	-0.5
Desipramine hydrochloride	3.8	2.3	2.2	2.4	5	-1.1	1.6	24.6
K114	3.8	3.4	2.8	3.9	5.7	-0.1	1.6	1.7
Melatonin	3.8	3	2.4	3	4.9	0.2	1.6	1.4
SKF 86466	3.9	3	1.9	2.7	4.7	0.9	1.6	0.4
(+)-MK-801 hydrogen maleate	3.9	0.8	0.4	2.3	2	0.1	1.6	1.2
6(5H)-Phenanthridinone	4.1	1.7	2	2.4	3.8	-0.3	1.6	0.7
Cephalothin sodium	4.6	2	2.2	1.9	2.4	-0.4	1.6	0.2
Dipropyldopamine hydrobromide	4.8	2.2	2.7	1.6	3.9	-0.1	1.6	-0.1
Metoclopramide hydrochloride	6.5	2.7	0.7	1.3	3.9	0.5	1.6	1.1
3-Aminopropylphosphonic acid	3.7	2.3	5.3	1.8	5.6	0.4	1.7	0.9
Epibestatin hydrochloride	3.7	3.2	3	3.1	5.7	0.3	1.7	0.5
WAY-100635	2.9	2.2	1.4	1.5	4.4	0.2	1.7	1.8
LP 12 hydrochloride hydrate	3.1	2.7	1.7	3.2	4.6	0.5	1.7	6.9
Zimelidine dihydrochloride	2.6	2.2	2.5	2.8	4.4	1.7	1.7	52.4
6-Chloromelatonin	1.7	2.2	4.1	3.2	3	0.3	1.7	1.5
TTNPB	2.8	2.9	1.8	2.4	3.8	-0.6	1.7	0.5
Nifedipine	2.8	0.7	1	2.8	4.6	-0.2	1.7	23.9
Lomefloxacin hydrochloride	3.4	1.4	2.2	2.2	2.9	-0.1	1.7	0.3
NBQX disodium	3.6	2.7	1.9	2.5	3.1	0.9	1.7	1.9
3-Morpholinosydnonimine hydrochloride	4	1.5	1.3	2.3	3.2	-0.5	1.7	0.6
Chlorzoxazone	4.3	2.4	2.8	3.3	5.9	0.4	1.7	7.9
Chlorpropamide	5	2.7	2.4	2.9	4.9	-0.3	1.7	0.3
U-101958 maleate	5.3	1.3	1.6	3.3	3.9	0.4	1.7	19.3
EGTA	5.7	2.5	3.5	2.3	3.1	-0.1	1.7	0.4
Terazosin hydrochloride	8.1	2.6	1.6	3.1	4.5	0.1	1.7	3.4
Valproic acid sodium salt	3.9	1.3	1.7	2.7	5.8	0.3	1.8	2.6
Quinolinic acid	3.4	1.6	2.6	3	4.4	-0.3	1.8	0.5
Nimustine hydrochloride	3.4	2.4	4.1	1.8	5.3	0.8	1.8	-0.1
Norcantharidin	3.4	1.4	2.5	1.8	5.9	0.8	1.8	0
SCH-28080	3.9	1.1	1.9	2.5	4.7	2.3	1.8	4.7
Promethazine hydrochloride	1.5	3	2.4	6	5.5	0.7	1.8	28.4
Trifluoperazine hydrochloride	1.9	0.2	2	2.9	4.2	-0.5	1.8	12.8
4-Imidazoleacrylic acid	1.9	1.7	0.2	1.7	3.4	-0.5	1.8	-0.4
Cyclophosphamide	2.3	1.2	-0.1	1.8	4.8	0.8	1.8	0.5
Imiloxan hydrochloride	2.5	2.9	2.8	2.9	4.6	-0.8	1.8	1.7
S(-)-3PPP hydrochloride	2.6	1.2	3	2	3.5	-0.9	1.8	0.2
Trifluperidol hydrochloride	2.7	1.2	1.9	1.9	3.5	1	1.8	14.8
Tyrphostin AG 808	2.7	3.6	1.1	3.6	3.4	0.2	1.8	5.2
S-Methylisothiourea hemisulfate	2.8	2.9	2.1	1.7	3.5	0.2	1.8	1.4
SB-206553	2.8	3.4	1.5	3	2.9	0.2	1.8	0.9
DCEBIO	2.9	3	0.4	3.2	3	0.8	1.8	0.5
5,7-Dichlorokynurenic acid	3	3.8	2	2.7	4	-0.3	1.8	-0.5
BMY 7378 dihydrochloride	3.3	2.1	2.3	1.2	2.5	0.8	1.8	3.6
6,7-Dichloroquinoxaline-2,3-dione	3.5	2.6	3.8	2.8	3.4	0	1.8	0.9
Thioridazine hydrochloride	4.4	2.2	2.6	2.2	4.2	-0.5	1.8	10.7
Ketoprofen	4.8	0.9	5.5	3	2.8	-0.1	1.8	1.5
Pimozide	5.2	4.7	3.8	3.5	4.9	-0.9	1.8	3.2
Piracetam	3.6	3.2	2.9	2.9	3.8	0.9	1.9	1.5
Agmatine sulfate	3.7	1.9	2.4	4.3	5.1	1.8	1.9	0.9
Triamcinolone	2.8	1.9	2	2.6	4	0.5	1.9	2.3
Quinelorane dihydrochloride	3	2.9	2	1.4	3.6	0.4	1.9	0.8
Praziquantel	1.4	1.8	2.7	2.3	2.7	1.1	1.9	5.1
Genistein	4.3	2.6	1.9	2.3	6.7	1	1.9	8.9
Cantharidic Acid	0.7	0.4	0	1	3.2	0.6	1.9	0.1
BRL 50481	2.1	0.2	1.2	2.7	2.2	1	1.9	1.5
Stevioside	2.6	1.5	0.8	2	1.8	-0.3	1.9	0.6
Aciclovir	2.7	2.9	2	2	6	0.5	1.9	0.1
Captopril	2.7	3.2	3.5	2.6	2.7	0.2	1.9	-0.6
Hemicholinium-3	2.7	2.9	1.9	3.3	3.8	0.4	1.9	1.4
Naltrexone hydrochloride	2.8	2.1	3	1.7	2.1	-0.7	1.9	1.4
alpha-Lobeline hydrochloride	2.9	2.4	2.7	2.9	4	0.4	1.9	5.6
Piceatannol	2.9	2.2	2	2.8	3.2	-0.1	1.9	1.1
Aconitine	3	2.5	1.4	3.9	4.6	-0.2	1.9	1.1
PPNDS tetrasodium	3	2.2	1.6	2	3.9	-0.3	1.9	0.2
B-HT 933 dihydrochloride	3.2	2.2	2	1.8	4.1	0	1.9	-0.4
WB 64	3.2	2.2	2	2	3.4	0.2	1.9	3.6
Decamethonium dibromide	3.4	2.2	2.7	3.2	4	-0.3	1.9	3
PAC-1	3.6	1.8	2.2	1.5	2.9	-0.5	1.9	4.1
S-Methyl-L-thiocitrulline acetate	3.6	3	3.5	2.7	6.3	0.3	1.9	2.2
Cephalexin	4	1.7	1	1.9	2	-0.7	1.9	0
BTCP hydrochloride	4	4	3.7	5.1	4.8	0.1	1.9	2.1
6-Fluoronorepinephrine hydrochloride	4.1	1.9	1.2	1.9	3.3	-0.7	1.9	0.4
8-Methoxymethyl-3-isobutyl-1-methylxanthine	4.3	2	1.3	1.9	2.4	0.6	1.9	0.1
Trimethoprim	4.4	2	0.1	4.6	4.1	0.3	1.9	4.2
Betaxolol hydrochloride	4.7	4	2.4	3.5	2.7	-0.5	1.9	1.5
Icilin	4.8	4.4	2.5	2.6	5	-0.4	1.9	1.2
3,4-Dichloroisocoumarin	5.1	2.2	2.1	1.9	3.5	-0.5	1.9	2.4
CGP-7930	5.4	1	1	5	3.6	6.4	1.9	39.1
BRL 52537 hydrochloride	7.7	4	3.3	2.7	3.9	0.6	1.9	4.7
Ipratropium bromide	3.8	3.5	1.6	2.6	3.7	2.8	2	2.7
MK-912	3.1	1.5	3	1.6	3.8	-0.2	2	0.9
Tyrphostin 1	4.4	2.2	2.4	2.5	3.1	2.2	2	6.3
Etazolate hydrochloride	5.9	4.5	5.9	4.3	5.5	0.4	2	0.4
Clodronic acid	1.3	1	0.8	1.3	4.9	-0.6	2	0
1-Phenyl-3-(2-thiazolyl)-2-thiourea	2	1.7	1.9	2	4.2	0.8	2	6.5
Palmitoyl-DL-Carnitine chloride	2.2	1.2	1.8	0.3	4.8	0.9	2	14.2
L-Cycloserine	2.3	2.2	1.7	2.4	4.3	0.8	2	1.1
Naphazoline hydrochloride	2.3	2.7	1.6	2.1	2.2	-0.6	2	0.1
Me-3,4-dephostatin	2.4	2.7	0.3	2.4	2.3	0.3	2	1.4
Buthionine sulphoximine	2.4	3.5	1.8	2.5	1.8	0	2	0.5
Caffeine	2.6	1.9	1.6	2.5	3.1	-0.5	2	1.3
Atropine	2.7	0.6	0.9	2	4.6	0.6	2	5.8
Bupropion hydrochloride	2.8	1.3	1.2	2.5	2.1	-0.4	2	0.6
Furegrelate sodium	2.9	2	2.9	2.7	4.2	0.5	2	0.7
Fenobam	3	1.9	1.3	2.5	3	1.8	2	5.5
Isotretinoin	3	2.4	2.8	2.1	2.1	-0.7	2	-0.1
Hexamethonium dichloride	3.1	1.8	1.1	2.3	3.5	0.2	2	0.8
SB 218795	3.2	2.2	1.5	2	2	3.7	2	1.8
5-(N,N-Dimethyl)amiloride hydrochloride	3.5	3.1	2.4	3	3.5	-0.5	2	0.8
5-Carboxamidotryptamine maleate	3.5	3.1	2.3	2	2.1	0.9	2	1.1
(±)-Nipecotic acid	3.6	2	1.6	1.5	1.8	0.5	2	1.2
Carmustine	3.8	1.6	1.5	3.1	4.6	-0.3	2	0.9
L-Glutamic acid, N-phthaloyl-	4	1.5	2.2	2.9	2	-0.5	2	0.7
Reactive Blue 2	4.2	2.9	2	3.1	3.6	-0.7	2	1.8
L-Cysteinesulfinic Acid	4.4	2.2	2.4	2.7	2.9	0.2	2	0.7
Aminoglutethimide	4.7	1.8	1.3	0.7	1.3	0	2	0
Atropine	4.9	3.9	2.2	3.2	1.6	-0.2	2	2.2
SKF 96365	3.6	3	2.9	3.5	5.5	0.4	2.1	23.7
Cefsulodin sodium salt hydrate	3.2	2.3	2.2	5.1	6.5	-0.1	2.1	1.1
Ibudilast	1.7	1.1	1.6	2	3.9	0.4	2.1	1
BTO-1	3.9	3.1	2.6	2.2	5.5	1.5	2.1	1.8
alpha-Guanidinoglutaric acid	2.4	2.5	3.2	2.6	5.4	0.2	2.1	0.9
SR 2640	2.2	2.7	0.9	3	1.1	2.1	2.1	0.3
(-)-Sulpiride	4	1.6	3.5	2.2	8.7	1.3	2.1	3.7
Chlorpromazine hydrochloride	2.9	2.7	0.4	1.8	6	0.2	2.1	73.4
(S)-3,5-Dihydroxyphenylglycine	0.4	0.3	0.1	1.5	0.2	0.4	2.1	0
Labetalol hydrochloride	2.2	2	1.5	2.6	3.2	-0.1	2.1	1.6
(-)-Naproxen sodium	2.4	3.9	1.1	4.6	2.6	0.3	2.1	0.1
Lithium Chloride	2.8	1.2	1.9	1.5	1	0.3	2.1	0.2
Vanoxeamine	3.1	1.3	1.8	1.7	4.3	2.8	2.1	13
S-(p-Azidophenacyl)glutathione	3.3	2.5	2.8	2.4	3	-0.3	2.1	2
Hexamethonium bromide	3.3	2.1	2.4	2.7	3.2	0.6	2.1	1.3
(+)-Catechin Hydrate	3.3	1.1	2	3.7	5.8	0.7	2.1	3
5'-Amino-5'-deoxyadenosine p-toluenesulfonate salt	3.3	0.4	0.9	1.5	5.8	0.9	2.1	0
Gabapentin	3.4	2.6	3.3	2.3	4.5	0.9	2.1	1
FSCPX	3.4	3.3	2	2.9	4	-0.1	2.1	-0.1
Trihexyphenidyl hydrochloride	3.5	2	2.7	1.6	0.8	2	2.1	7.2
ICI 204,448 hydrochloride	3.6	2.7	2.8	2.5	4.2	-0.3	2.1	-1
DL-Homatropine hydrobromide	3.7	3.3	1.5	3.5	5.4	0.6	2.1	1.9
1-(4-Hydroxybenzyl)imidazole-2-thiol	3.7	1.8	2.4	2.1	4.5	0.6	2.1	1.2
Cephalosporin C zinc salt	3.7	2.3	2.9	3	2.8	0.6	2.1	1.3
Rolipram	3.8	3.3	2.7	1.8	2.2	-0.3	2.1	1
NG-Nitro-L-arginine	3.9	1.4	1.6	3.4	2.7	-0.4	2.1	0.6
Imetit dihydrobromide	3.9	2.5	1.7	2.1	5.6	0.2	2.1	-0.2
BIA 2-093	4.2	2.6	2.7	3	3.7	-0.3	2.1	2.3
Phentolamine mesilate	4.2	4	2.8	3.5	3.2	0.4	2.1	0.2
5-Fluoroindole-2-carboxylic acid	4.3	6.1	2.5	4.9	3.1	0.8	2.1	0.7
Cytidine 5'-diphosphocholine sodium salt hydrate	4.3	2.5	3.5	2.5	2.1	-0.5	2.1	0.8
Nitrendipine	5.5	4.9	2.5	2.7	2.7	3	2.1	7.9
Tilarginine acetate	3.5	3.1	2.3	3.3	5.6	0.7	2.2	1.3
Zaprinast	3.8	3.6	3.5	3.6	4.3	0.8	2.2	-0.3
PD 168,077 maleate	4.7	2.9	1.7	1.9	6.2	0.5	2.2	-1.1
Perphenazine	3.3	1.9	1.3	1.3	2.8	-0.4	2.2	19.6
N-(3,3-Diphenylpropyl)glycinamide	2.2	1.4	1.3	2	3.7	0.9	2.2	38.6
DL-p-Chlorophenylalanine methyl ester hydrochloride	2.3	3.3	0	3.8	3.1	1.1	2.2	0
8-(4-Chlorophenylthio)-cAMP sodium	2.5	2.2	3.6	3.7	2.7	1.4	2.2	1.6
Phaclofen	2.7	0.8	1.3	1.7	6.8	1.2	2.2	1.7
AB-MECA	2.7	1.2	2.6	3.7	4.3	0.9	2.2	5.9
Phenamil methanesulfonate	2.7	2.4	2.2	2.1	3.4	0.8	2.2	2.9
Org 27569	2.8	2.6	2.3	2.3	3.4	2.3	2.2	17.3
Hydroxylamine hydrochloride	2.9	0.5	0.1	3.8	5.1	0.3	2.2	-0.4
Ro 20-1724	3	2.3	1.5	4	2.2	-0.1	2.2	1.9
D-Serine	3.1	2.2	1.9	0.8	3.9	-0.1	2.2	0.6
Amoxapine	3.1	3.4	2.4	2.3	4.4	-0.2	2.2	12.1
Hydrochlorothiazide	3.3	3.3	1.4	1.8	2.7	1.1	2.2	1
Capsazepine	3.3	2.7	2.7	3.1	4.2	0.1	2.2	0.8
Ethopropazine hydrochloride	3.4	1	-0.3	1.9	0.8	-0.8	2.2	-0.4
Fomepizole	3.4	2.5	0.5	1.6	3.8	1.1	2.2	1.9
Clorgyline hydrochloride	3.5	0.2	4.6	1.9	6.1	1.9	2.2	16.5
(-)-Bicuculline methbromide, 1(S), 9(R)	3.6	2.6	1.5	3.6	5.1	1.6	2.2	1.5
Molindone hydrochloride	3.7	3	3.3	2.9	8.9	2.2	2.2	4.8
SR 57227A	3.7	2.7	2.3	1.7	3.5	-0.4	2.2	2.5
Aurintricarboxylic acid	3.7	2.4	1.8	3.2	4.4	0.5	2.2	0.4
Cefazolin sodium	3.7	2.4	1.8	2.2	5.2	0.1	2.2	1.1
Ro 04-6790 dihydrochloride	3.8	2.2	1.5	2	3.5	-0.4	2.2	3
BU99006	3.8	2.2	2.2	2.3	5.7	-0.1	2.2	0.6
Methoctramine tetrahydrochloride	3.8	2.4	1.5	2.4	1.5	0.1	2.2	0.1
BRL 37344 sodium	4	2.7	1.9	2.6	5.3	1.1	2.2	0.9
4-(2-Aminoethyl)benzenesulfonyl fluoride hydrochloride	4.1	2.7	3.4	2.3	4.5	0.8	2.2	3.7
BW 284c51	4.3	3.8	3.7	3.5	3.4	0.7	2.2	3.1
R(-)-Apocodeine hydrochloride	5.1	3.2	3.3	2.9	5.7	1.3	2.2	1
Alprenolol hydrochloride	5.7	2.3	1.6	2.2	1.9	0.3	2.2	4.5
4-Aminobenzamidine dihydrochloride	3.4	2.3	2.6	3.2	6.1	0.3	2.3	2.1
TBBz	3.9	3.1	2.5	5	4.8	0.9	2.3	0.2
Bezafibrate	2.5	1.3	2.1	7.1	7.2	-0.2	2.3	0.2
Pilocarpine nitrate	4.2	3	1.3	2.4	5.5	1.4	2.3	0
Propafenone hydrochloride	2.9	1.2	5.4	2.4	5.8	5.6	2.3	81.5
2-(2-Aminoethyl)isothiourea dihydrobromide	1.8	1	1.2	0.7	3.9	-0.4	2.3	0.4
CX 546	2.1	1.9	1.4	2.7	3.2	-0.6	2.3	1.2
Ribavirin	2.9	2.5	2.1	2.9	3.8	-0.8	2.3	0.8
U0126	3	1.4	4.9	1.1	7.4	1.9	2.3	16.6
U-74389G maleate	3.1	1	1.4	2.6	2.4	0.5	2.3	0.5
Bisoprolol	3.1	2.1	0.2	2.2	1.8	0	2.3	1.4
Bromoacetyl alprenolol menthane	3.2	2.4	4.2	1.7	3.9	-0.3	2.3	12.7
SQ 22536	3.4	1.8	0.5	2.2	2.2	-0.5	2.3	2.4
Furosemide	3.7	2.8	2.2	3	3.8	-0.6	2.3	0.8
CGP-13501	3.8	2.3	2.6	2	7.8	0.2	2.3	7.6
cis-4-Aminocrotonic acid	4	3.5	2.7	1.8	4.5	-0.7	2.3	0.7
Propantheline bromide	4	2.9	2.2	3.9	3.9	-0.6	2.3	-0.5
Cirazoline hydrochloride	4.2	3.3	1.6	2.5	2.7	0.7	2.3	4.5
IB-MECA	4.2	0.4	2.2	2	4.5	1.2	2.3	1
2-Phenylaminoadenosine	4.4	2.7	3	2.4	3.6	0.3	2.3	2.6
Fusidic acid sodium	4.4	1.8	2.1	4.3	3.4	-0.1	2.3	1
4-Aminopyridine	4.5	2.7	3.8	2.1	3.7	0.3	2.3	3.1
N-Methyl-1-deoxynojirimycin	5	1.9	1.7	3.4	3.8	0.3	2.3	0.6
Ibuprofen lysine	5.5	3.6	2.5	2.4	2.9	0.6	2.3	-0.4
NADPH tetrasodium	2.7	1.1	1.2	3.4	4	-0.1	2.4	0.4
Isoxanthopterin	2.8	1.9	0.7	1.6	2.9	0.2	2.4	2.6
MDL 26,630 trihydrochloride	3	1.4	3.3	2.1	2.3	-0.2	2.4	0.3
Spiroxatrine	3	3.9	4.5	2.9	3.6	-0.3	2.4	1.2
Alinidine	3	2.7	2.5	1.6	1.7	-0.6	2.4	-0.2
(±)-Octopamine hydrochloride	3	2	2.7	2.1	2.3	-0.1	2.4	0.6
NS 2028	3	2	2.9	3.3	4.2	0.5	2.4	-0.6
SKF-89976A	3.1	2.6	3.3	2.6	2.2	0.6	2.4	0.8
CCT007093	3.3	1.8	2.2	2.4	3.2	-0.1	2.4	1
(±)-cis-Piperidine-2,3-dicarboxylic acid	3.3	3.7	0.5	0.9	4.7	0.4	2.4	1.5
SDZ-205,557 hydrochloride	3.4	2.4	3.1	3.2	2.8	0.5	2.4	0.1
N^G,N^G-Dimethylarginine hydrochloride	3.5	2.6	2.1	3.6	6.2	0.2	2.4	1.1
Fulvestrant	3.9	2.5	2.2	2.1	2.2	-0.2	2.4	2.3
8-Bromo-cAMP sodium	4	2.3	3.1	2.9	3.9	0.5	2.4	2
R(+)-IAA-94	4.1	3.1	2.8	3.3	8.8	0.9	2.4	0
Antozoline hydrochloride	4.2	1.9	1.4	3.6	4.1	-0.3	2.4	3.1
Proglumide	4.2	5	2.5	4.2	3.7	0.7	2.4	1.2
Thio-NADP sodium	4.6	1.1	1	2.7	6	0.6	2.4	0.2
Ropinirole hydrochloride	4.8	4	3.3	3.8	3.9	0.7	2.4	0.9
Naftopidil	5.6	5.2	3.9	6	4.1	-0.2	2.4	23.9
(±)-Quinpirole dihydrochloride	3.5	2.7	2.8	2.8	5.2	0.8	2.5	1.6
ARL 67156 trisodium salt	6.1	2.8	3.1	3.4	5.6	1.4	2.5	1.7
ATPO	4	1.9	2.3	3.9	3.2	-0.2	2.5	1.5
Cortisone	2.4	1	0.4	1.9	4.3	0.2	2.5	4.7
Lificiguat	3.3	2.7	1.7	2.8	3.9	0.8	2.5	4.7
Gallamine triethiodide	4.6	2	2.9	2	6.9	0.4	2.5	1.6
2,3-Dimethoxy-1,4-naphthoquinone	1.5	2.3	2.2	2	5.1	0.2	2.5	3.3
Idarubicin hydrochloride	2.1	3.5	1.4	5.1	5.4	3.1	2.5	122.4
(-)-Eseroline fumarate	0.8	1.9	0.1	5	2.4	0.3	2.5	0.6
Tolbutamide	2.3	1.5	2.2	3.3	2.5	0.3	2.5	-0.6
Dopamine hydrochloride	2.9	2.6	1.3	1.9	5.2	-0.1	2.5	2.5
Vinpocetine	3.1	2.7	1.7	2.7	5	-0.7	2.5	7.9
N,N-Dihexyl-2-(4-fluorophenyl)indole-3-acetamide	3.2	3	2.6	4.9	4.4	-0.1	2.5	2.3
INO-1001	3.3	2.9	2.1	2	3.4	0.7	2.5	1.3
4-DAMP methiodide	3.4	-0.1	0.4	0.6	4.5	0.9	2.5	1.5
L-Beta-threo-benzyl-aspartate	3.5	3	2.6	2.5	3.1	2.2	2.5	-0.8
Phloretin	3.5	3.2	3	3.3	5.1	1.3	2.5	8
Disulfiram	3.6	2.9	1	1.3	2.3	2.3	2.5	6.1
p-Aminoclonidine hydrochloride	3.7	3.5	2.3	2.6	4.4	1.1	2.5	1.2
Droperidol	3.9	2.9	3	3.2	6.4	0	2.5	9.8
Dihydroergotamine	4.6	3.7	2.8	3.2	5.7	0	2.5	5.3
Pentylenetetrazole	3.2	1.8	2	2.4	3.1	0.4	2.6	1.1
Zalcitabine	2.5	3	5.5	2.7	4.3	2.7	2.6	4.7
Carboplatin	2.9	1.9	1.2	2.3	5.9	0.9	2.6	1.7
PNU-282987	2.8	2.1	1.9	2.3	4	1.2	2.6	3.8
Quercetin	2.7	2.3	2.3	1.6	2.6	1.5	2.6	4.2
5alpha-Pregnan-3alpha-ol-11,20-dione	3	0.4	1.1	1.7	1.6	2.7	2.6	18.7
CGP 57380	2.1	2.2	2.5	3.1	4	-0.8	2.6	1.2
Fluphenazine hydrochloride	2.1	1.3	1.3	2.3	2.8	0.9	2.6	44.1
Ro 41-1049 hydrochloride	2.6	1.3	3.1	3.8	3.3	-0.3	2.6	2.4
Terfenadine	2.7	3.7	2	3.4	3.4	0.3	2.6	2
Ebastine	2.8	1.7	1.9	1.7	5.5	3.7	2.6	0.2
SB-525334	2.9	1.5	0.8	3.7	3.2	-0.3	2.6	3.2
CP55940	3.1	1.7	2.6	2.8	4.9	-0.3	2.6	13.8
Sodium Taurocholate hydrate	3.1	3	2.8	5.5	6.6	0.6	2.6	2.6
Propentofylline	3.5	3.3	3.7	3.9	3.9	-0.3	2.6	2.6
Carbamazepine	3.7	2.7	1.9	1.9	4.1	0.4	2.6	1.4
N-Oleoyldopamine	3.9	3	2.4	4.7	7.9	1.9	2.6	0.4
L-N6-(1-Iminoethyl)lysine hydrochloride	4	3.9	3.7	3.7	4.7	0.3	2.6	0.9
(±)-Brompheniramine maleate	4	2.9	4.6	4.6	2.5	-0.7	2.6	0.9
Danazol	4	2.3	1.7	2.7	2	0.5	2.6	1.9
Noradrenaline bitartrate monohydrate	4.1	2.8	1.6	2.1	3.4	0.2	2.6	3.7
Oxolinic acid	4.4	1.2	0.3	4.6	1.8	-0.7	2.6	1.4
3-Methoxy-morphanin hydrochloride	4.5	2.7	3.2	2.4	3.9	-0.9	2.6	19.8
Thalidomide	4.5	3.3	2.2	2	1.9	0.3	2.6	2.4
1,3-Dipropyl-8-p-sulfophenylxanthine	4.7	3	3.2	2.7	5	0.8	2.6	1.6
O-(Carboxymethyl)hydroxylamine hemihydrochloride	4.8	-0.1	0.3	1.8	5.7	1.9	2.6	0.1
Protoporphyrin IX disodium	5.4	4.5	5.4	7.7	7.4	0.9	2.6	11.9
Aurothioglucose	5.7	3.7	2.8	4.2	4.2	0.3	2.6	1.3
Disopyramide	6	3.6	0.1	2.3	3.7	1.9	2.6	5.7
AC-55649	3.2	2.2	1.9	2.2	3.1	-0.1	2.7	2
Actinonin	-0.1	0.1	0.3	0	-0.6	-0.3	2.7	0.5
(-)-Scopolamine,n-Butyl-, bromide	2.4	2.6	2.4	4.2	3.8	0.3	2.7	1
L-Canavanine	1.8	2	1.1	1.8	5.4	0.4	2.7	2.2
(-)-alpha-Methylnorepinephrine	3.6	1.7	1.9	2.2	4.6	0.7	2.7	9.5
Yohimbine	5.2	2.8	1.9	3	3.2	0.3	2.7	3.7
Phosphomycin disodium	2.5	0.5	0.9	3.7	3.3	0.8	2.7	0.1
1-(5-Isoquinolinylsulfonyl)-2-methylpiperazine dihydrochloride	1.9	3.9	2.1	4.3	2.4	0.6	2.7	-0.1
A-68930 hydrochloride	2.3	2.2	3.4	4.6	4	0.8	2.7	1.2
5alpha-Pregnan-3alpha-ol-20-one	2.4	2.5	1.1	0.5	2.1	-0.3	2.7	0.8
Sobuzoxane	2.6	2.5	3.2	3.9	5.4	0.3	2.7	2.3
Cilostamide	2.7	0.9	1.6	2.2	3.7	0.9	2.7	5.5
Chlorpheniramine	2.8	7	2.1	4.7	3.8	0.9	2.7	12.8
Phenserine	2.9	2.2	1.2	3	1.6	0.1	2.7	3.9
Pentoxifylline	3	2.5	1.9	2.3	3.5	-0.4	2.7	3.4
(±)-7-Hydroxy-DPAT hydrobromide	3	3.5	2.1	2.4	5.1	0.3	2.7	0.4
Oxiracetam	3.1	1.7	5.6	4.9	3.3	0.4	2.7	2.1
N6-Methyladenosine	3.2	2	2	2.8	2.6	5.5	2.7	2.6
4-Hydroxy-3-methoxyphenylacetic acid	3.2	1.4	0.1	2.4	2.2	-0.3	2.7	0.3
TG-003	3.6	2	1.7	1.8	3.2	0.2	2.7	2.2
Tetradecylthioacetic acid	3.7	1.9	2.2	2.7	2.6	-0.8	2.7	1.4
Flumazenil	3.8	1.9	2.5	2.9	4.9	0	2.7	1.4
WB-4101 hydrochloride	4	3.5	2.3	3.8	3.9	-0.3	2.7	6.9
Phosphonoacetic acid	4	4.6	3.6	5	3.8	1.4	2.7	-0.1
SB-415286	4.3	2.6	2.9	2.1	5.3	1	2.7	5.3
gamma-Acetylinic GABA	4.3	2	3.5	2.3	4.7	-0.5	2.7	0.8
Kenpaullone	4.4	1.2	1.4	2.5	6.2	1.8	2.7	1.5
Clozapine	4.7	2.4	2.8	2.7	2.6	0.8	2.7	13.5
Telenzepine dihydrochloride	4.8	4	3.4	4	6.9	-0.1	2.7	1.5
Phosphoramidon disodium	5	2.7	2.6	2.3	4	0.5	2.7	1.1
Atropine methyl nitrate	6.3	3.6	2.8	3.4	4.6	0	2.7	1
REV 5901	7.9	3.5	1.7	1.9	5.7	2.9	2.7	44.4
Sematilide monohydrochloride	3.3	2.3	1.6	1.6	6.5	0.3	2.8	1.9
O-Methylserotonin hydrochloride	3.8	4.3	3.5	4.2	4.7	1	2.8	2.6
Pifithrin-mu	2.4	2	1.4	1.8	3.2	0.1	2.8	1.4
Bromoenol lactone	5.4	3.3	1.7	3.2	7.1	1	2.8	-0.1
cis-Azetidine-2,4-dicarboxylic acid	2.9	0.5	-0.6	1.7	3.5	0.1	2.8	1.6
(-)-Scopolamine methyl bromide	3.2	3.6	2.8	4.3	5.8	1.3	2.8	3.3
(E)-4-amino-2-butenoic acid	2.5	2.7	2.8	2.5	4.3	0.5	2.8	1.7
Triamterene	2.6	2.6	3.6	2.5	3.2	0.2	2.8	2.8
Mibefradil dihydrochloride	2.6	2.4	2.1	3.9	5	0.8	2.8	51
3-alpha,21-Dihydroxy-5-alpha-pregnan-20-one	2.6	1	4.6	2.8	7.8	6.7	2.8	11
Hydroxyurea	2.7	3.8	3.4	3.3	3.4	1.3	2.8	2.1
SIB 1757	2.9	2.6	1.5	2.4	2.6	0.4	2.8	3.1
Diphenyleneiodonium chloride	2.9	1.8	2.6	1.4	3	-0.3	2.8	20.1
Cyclosporine A	3	4	2.6	4.2	3.4	3.7	2.8	2.8
Tacrine hydrochloride	3.1	1.9	2.7	2.7	5.1	-0.4	2.8	0
Benserazide	3.3	0.6	0.5	2.3	2.2	0.3	2.8	8.3
NCS-382	3.4	2.6	1.4	3.3	3.1	0.8	2.8	1.2
Clonidine	3.4	2.4	3	0.7	2.8	-0.1	2.8	0.3
3,5-Dinitrocatechol	3.4	1.6	2.1	2.3	4	-0.4	2.8	1.2
Citalopram hydrobromide	3.5	2.1	2.8	3	7.3	4	2.8	51.6
(±)-CGP-12177A hydrochloride	3.5	3.3	2.8	3.7	4.6	1.1	2.8	2.3
DFB	3.5	1.6	2.8	3	2.1	-0.5	2.8	-0.5
S-Nitrosoglutathione	3.5	2.3	2.4	3.8	5.4	0.8	2.8	0.4
Palmitoylethanolamide	3.6	3.5	3.4	3.8	5.3	0.7	2.8	3.7
Tetraisopropyl pyrophosphoramide	3.6	4.8	2.4	4.8	3.8	-0.1	2.8	0.3
N-Acetyltryptamine	3.6	3.8	3.6	2	4.9	0.7	2.8	3.9
R(+)-Butylindazone	3.7	2.4	2.4	2.6	5.4	1.7	2.8	0.8
Brivudine	3.9	2.2	3.1	2.3	3.8	2.1	2.8	3
ARP 101	4	4.7	1.2	3.5	4.9	1.8	2.8	18.5
Minocycline hydrochloride	4.1	2.9	1.7	6.5	5.4	1.4	2.8	4.2
Phenelzine	4.2	4	3.4	3.9	5.5	1.5	2.8	7.1
Masoprocol	4.2	1.6	0.3	3.7	4.9	0.4	2.8	9.5
Olomoucine	4.4	3.9	2.1	1.5	8.5	0	2.8	1.7
S-(4-Nitrobenzyl)-6-thioinosine	4.6	4.7	4.1	4.2	4.4	-0.2	2.8	5.1
Steviol	4.6	1.8	3.4	2.6	3.2	-0.2	2.8	2.9
(±)-Metoprolol (+)-tartrate	4.7	1.4	0	1.6	5.1	0	2.8	1.7
Ofloxacin	5.4	2.6	2.1	3.9	4.7	1.2	2.8	0.7
Amantadine hydrochloride	6.2	3.5	0.7	1.5	5.2	0.6	2.8	0.4
3-Isobutyl-1-methylxanthine	6.3	3.8	2.1	3.1	4.1	0	2.8	2.8
Cinoxacin	3.1	2.2	2.1	2.5	7.1	1.1	2.9	0.6
(-)-Quinpirole hydrochloride	3.9	2.1	1.7	1.5	4.6	1.2	2.9	2
(+)-Pilocarpine hydrochloride	3.6	4.2	4.5	6.9	5.7	0.9	2.9	2.5
Se-(methyl)selenocysteine hydrochloride	2.1	1.2	1.8	2.5	4.4	0.4	2.9	-0.2
L-Canavanine sulfate	3.7	2.6	1.9	6.1	4	2.1	2.9	0.8
Chlorprothixene hydrochloride	2.8	2.9	0.8	1.5	4.4	0.4	2.9	47.2
N-Acetyl-L-Cysteine	0.6	0.2	0.7	0.8	0.8	1	2.9	0.7
2-Hydroxysaclofen	1.6	1.1	2.5	1.7	3.8	-0.2	2.9	0.3
THIP hydrochloride	2.1	3.1	2.4	3.2	2.7	-0.2	2.9	0
SIB 1893	2.4	5.2	2.2	4.9	3.7	0.4	2.9	0.7
ODQ	2.4	1.6	0.7	2.1	1.6	0.1	2.9	13.5
Mecamylamine hydrochloride	2.4	3.3	0.7	2.9	2.1	-0.3	2.9	2.1
SR-95531	2.4	2.8	2.3	4.2	5.2	0.2	2.9	1
4-Hydroxyphenethylamine hydrochloride	2.6	1.9	2.2	3	4.5	1.4	2.9	2.3
Fexofenadine hydrochloride	2.8	1.6	1.1	1.2	4.3	0.9	2.9	1.1
L-alpha-Methyl-p-tyrosine	3	4.4	4.5	2.7	2.3	1.2	2.9	2
Methyldopa	3.1	2.7	2.9	3.2	2.9	0.8	2.9	1.5
Tyrphostin AG 538	3.1	4.1	2.9	4.4	3.7	0.5	2.9	4
Eliprodil	3.1	2.1	2.3	3.5	4.4	-0.3	2.9	2.7
3-Iodo-L-tyrosine	3.2	2.3	1.8	3	5	0.6	2.9	2.1
BP 897	3.2	3.2	1.3	0.9	2	0.1	2.9	11.2
Stattic	3.3	1	0.8	1.6	5.8	0	2.9	2.2
Phenylbutazone	3.5	6.1	3.6	4.1	3.3	-0.1	2.9	-0.1
MHPG sulfate potassium	3.7	3.9	3.5	3.6	5.9	1.9	2.9	2.4
Clotrimazole	3.9	0.7	0.4	3.9	1.8	3.9	2.9	3.2
Betaine aldehyde chloride	3.9	2.9	3.3	1.8	3.9	-0.1	2.9	1
Altretamine	4.1	2.4	-0.2	1.7	4.7	1	2.9	2.1
BIX-01294	5.1	0.8	1.8	3.4	5.6	-0.3	2.9	3.2
1-Phenylbiguanide	5.6	0.5	4.4	5	4	0.8	2.9	2.7
(±)-alpha-Methyl-4-carboxyphenylglycine	5.7	3.2	3.6	3.9	5.1	1.5	2.9	0.8
AS-605240	5.9	1.7	2.8	3.5	6.2	-0.6	2.9	1.3
Cysteamine hydrochloride	3.8	1.8	4.3	3.8	6.3	1.1	3	4.1
Olprinone	3.7	4.8	3.2	4.8	4.7	2.7	3	0.8
Aprindine hydrochloride	3.1	3.3	2.8	3.2	3.1	1.9	3	36.2
Tyrphostin AG 527	1.5	4.4	1.5	1.7	3.2	2.5	3	18.2
6-Hydroxy-DL-DOPA	2	1.3	0.7	1.9	1.6	-0.3	3	-0.4
rac-2-Ethoxy-3-hexadecanamido-1-propylphosphocholine	2.3	3.6	1.1	3.8	2.8	2.2	3	10.7
S-Nitroso-N-acetylpenicillamine	2.3	3	3.3	3.2	4.5	0.4	3	0.7
(±)-2-Amino-3-phosphonopropionic acid	2.5	3.1	1.4	3.7	6.2	1.3	3	3.5
5-Hydroxytryptophan	2.8	2.3	1.4	2.7	4.3	1.8	3	1.3
Ammonium pyrrolidinedithiocarbamate	3.1	4.3	2.1	5.2	4.7	0	3	2.5
4-Chloromercuribenzoic acid	3.5	2.3	3.4	3.7	5.1	0.3	3	1.5
2,3-Butanedione	3.6	2.7	2.4	4.7	3.5	1.1	3	1.5
L-732,138	3.7	2.2	2.2	2.8	4.2	-0.3	3	4.2
Arcaine sulfate	3.8	4	4	2.9	5	0.6	3	2.2
(±)-Epinephrine hydrochloride	3.8	3.2	4.2	4	4.4	5.1	3	6.1
Bay 11-7082	3.8	2.1	2.4	2.6	5.3	1.1	3	2.2
MRS 2179	3.8	2.4	2.3	1.8	5	-0.4	3	1.5
Aminopterin	4.2	3.4	2.4	3.6	4.4	-0.6	3	2.1
Ceftriaxone sodium	4.4	2.7	3.2	2.9	6.3	0.8	3	0.6
SB-215505	4.6	5	4.2	4	4.1	0.4	3	3.1
(±)-HA-966	4.6	3.8	3.6	3.4	2.7	0.4	3	1
Imipramine hydrochloride	4.8	3.8	3.9	4.2	4.4	-0.2	3	16.3
Cefaclor	6.6	2.6	4.3	2.1	6.1	-0.4	3	1.3
Ethosuximide	7.1	2.3	2.2	3	5.1	0.4	3	0.8
(±)-AMPA hydrobromide	9.1	7.6	7.6	5.4	11.9	4	3	3
Vanillic acid diethylamide	3	2.4	2.7	2.7	5.8	0.6	3.1	2.4
E-64	2.7	5.1	1.5	1.5	5	1	3.1	2
(±)-2,3-Dichloro-alpha-methylbenzylamine hydrochloride	1.7	3	1.5	2.9	4.3	-0.4	3.1	4.1
MDL 105,519	2.3	3.1	2.9	1.5	6.8	-0.9	3.1	-0.3
Pargyline hydrochloride	2.3	3.3	2.6	4	4.6	0	3.1	1.1
(±)-2-Amino-5-phosphonopentanoic acid	2.4	2.1	3.3	3.2	8.4	0.6	3.1	2.4
Apomorphine hydrochloride hemihydrate	2.5	1.2	1.8	2.7	4.3	0.9	3.1	2.5
Fenoldopam	3	1.4	0.9	2.3	3	0.2	3.1	0.1
TCPOBOP	3	2.3	2.9	3.1	3.2	0.8	3.1	2.2
Ciprofibrate	3.1	1.2	1.2	1.7	3.8	0.6	3.1	0.7
Acetohexamide	3.1	0.8	0.1	1.7	5	0.4	3.1	0.5
Theobromine	3.2	2.5	2.3	3.5	5.4	1.3	3.1	1.8
5-hydroxydecanoic acid sodium	3.4	2	2.7	2.3	6.1	1.5	3.1	0.6
SB 200646 hydrochloride	3.4	2.8	2.9	3.1	5.5	0.5	3.1	3.4
Rottlerin	3.5	2.8	6.3	4.8	7.7	0.9	3.1	7.4
DNQX	3.9	3.2	4.5	3.4	4.8	1.2	3.1	1.3
GR 46611	4	2	3.1	7	4.6	0.9	3.1	1.8
ML-7	4	2.7	1.8	1.6	0.8	7.1	3.1	144.5
N-Methyl-beta-carboline-3-carboxamide	4.1	2.6	2.6	2.8	2.8	0.7	3.1	3.7
Pyrazinamide	4.1	2.9	2.7	4.4	4.5	1.3	3.1	2.4
CGP-74514A hydrochloride	4.2	2.4	2.3	3.6	2.7	1.1	3.1	10.4
Diltiazem hydrochloride	4.8	-0.1	0.3	3.3	3.9	0.6	3.1	5.9
Propionylpromazine hydrochloride	4.9	2.6	2.2	2.4	2.8	1	3.1	11.5
beta-Chloro-L-alanine hydrochloride	5.6	4.9	3.5	4.2	4.9	2.1	3.2	2.5
p-Benzoquinone	2.9	1.8	3.3	6.4	5.9	1.2	3.2	2.9
LY-294002	2.7	3.6	2.1	3.5	4.7	1.1	3.2	0.8
6-Methoxy-1,2,3,4-tetrahydro-9H-pyrido[3,4b] indole	0.8	1.4	0.5	2.3	3.8	0.7	3.2	4.9
AL-8810	2	1.5	1	1.1	6.3	0.4	3.2	2.3
10058-F4	2.3	2.2	1.9	2.6	2.7	1.2	3.2	6.8
N-arachidonylglycine	2.9	2.7	2.2	2.7	4.1	0.1	3.2	2.1
R(-)-Me5	3.3	2.7	1.6	2.4	3.3	0.8	3.2	43.7
CNQX disodium	3.4	3	2.9	4.5	4.1	2.2	3.2	3.3
Sulfaphenazole	3.4	2.5	3.3	2.7	4.7	0.3	3.2	1.5
Dihydrokainic acid	3.5	3.1	2.4	4.6	5.2	0.9	3.2	1.1
(-)-Scopolamine methyl nitrate	3.5	2.6	2.8	4.8	6.5	1	3.2	2.7
Granisetron hydrochloride	3.5	1.8	2	4.9	3.7	1.1	3.2	3.3
Histamine dihydrochloride	3.5	2.7	2.6	4.2	4.9	1	3.2	0.7
L-Mimosine from Koa hoale seeds	3.7	1.7	1.4	2.5	2.5	-0.2	3.2	0.9
Buspirone hydrochloride	3.8	3.1	3.2	4.6	5.7	1.2	3.2	4.8
R(+)-3PPP hydrochloride	4	3	3.5	3.2	4.1	-0.2	3.2	1.6
1-(2-Methoxyphenyl)piperazine hydrochloride	4.2	3.2	2.2	1.4	8.1	0.1	3.2	1.6
Resveratrol	4.2	3.1	3.3	5.3	3.3	1.6	3.2	7.1
Azelaic acid	4.7	4.1	2.8	3.6	4.3	0.6	3.2	0
L-Tryptophan	5.2	2.5	3.7	3.9	3.4	0.6	3.2	4.5
NBI 27914	7.4	4.7	7.4	5.1	4.6	3.7	3.2	1
Choline bromide	3.9	2.3	2.3	3.4	5.9	2.1	3.3	6.6
SB 269970 hydrochloride	4.5	3.5	2.2	3.5	6.1	1.1	3.3	9
Eflornithine Hydrochloride	4	5.7	4.6	5.5	6.8	3.2	3.3	3.1
WIN 62,577	3.1	1.9	1.6	1.1	9.4	2.5	3.3	2.6
Xanthine amine congener	4.1	1	0.7	3.4	3.8	1.9	3.3	1.8
Phenytoin sodium	2.8	1	0.4	1.2	5	0.7	3.3	2.8
S(-)-Timolol maleate	4.2	2.3	2.1	3.1	5.3	1	3.3	-0.1
Na-p-Tosyl-L-lysine chloromethyl ketone hydrochloride	3	1.9	2.9	2.6	4.5	1.4	3.3	0
Ubenimex	2.1	2.1	2.5	2.3	3.8	0.6	3.3	-0.4
Semicarbazide hydrochloride	2.2	5.8	3.9	4.2	5.1	0	3.3	10.7
Cisplatin	2.3	3	1.8	2.7	2.9	0	3.3	0.3
SU 9516	2.6	2	2	2	4.4	1.9	3.3	7.7
3-Amino-1-propanesulfonic acid sodium	2.7	2.4	2.8	2.9	4.2	0.3	3.3	1.9
L-Methionine sulfoximine	2.7	1.5	0.9	2.9	3.5	0.9	3.3	1.3
SB 204741	2.8	3.1	2.6	2.2	3.1	1.2	3.3	6.7
Piribedil maleate	3.1	1.7	2.3	1.7	2.9	-0.7	3.3	1.9
S-(-)-Eticlopride hydrochloride	3.3	3.9	0.5	2.7	3.2	0.4	3.3	11.9
p-MPPF dihydrochloride	3.3	2.2	2.3	1.6	3.3	0.2	3.3	10.2
Pindolol	3.4	0.8	0	4	2	0	3.3	2.8
LY-367,265	3.6	0.5	0.3	1.7	7.1	1.5	3.3	4.1
Benoxathian hydrochloride	3.6	3.8	4.4	5.1	4.1	-0.5	3.3	10.3
L-162,313	3.7	1.3	2.2	3.1	2.3	3.1	3.3	5.1
Isoliquiritigenin	3.8	2.3	2.3	3.4	3.6	2.5	3.3	23.8
Clomipramine hydrochloride	3.8	1.9	1.3	2.1	4	0.6	3.3	57.7
Ruthenium red	4	3.5	5.9	4.7	2.8	1.3	3.3	0.5
CGS-15943	4	3.6	0.4	2.8	3.4	1.7	3.3	1.1
Chlorothiazide	4.2	2.9	2.6	3.4	3.2	0.8	3.3	1.2
L-Aspartic acid	4.5	3.8	2.3	5.2	4.4	0.8	3.3	2.5
Pheniramine maleate	4.7	4.1	3.8	3.2	2.9	0.7	3.3	0.8
Tropicamide	5	2.4	2.4	2.7	4	1.2	3.3	1.6
(±)-AMT hydrochloride	5	1.1	2.6	1	4.5	0.8	3.3	0.1
8-Cyclopentyl-1,3-dipropylxanthine	6.3	6.4	4.7	3.8	4.1	0.6	3.3	2.1
N-Phenylanthranilic acid	7.8	6	4.8	11.7	6.7	0.1	3.3	3.8
R-(+)-7-Hydroxy-DPAT hydrobromide	3.6	1.7	1.5	1.6	3.9	0.3	3.4	0
GW405833 hydrochloride	4.5	-0.1	1	2.5	5	-0.5	3.4	19.5
Naltrindole hydrochloride	2.7	1.6	2.2	2.5	3.5	0.8	3.4	16.3
Doxepin	3.1	2.4	2.9	3.4	7.1	0	3.4	20.3
5-Hydroxyindolacetic acid	2.5	2.1	1.1	3.3	5.3	0.2	3.4	2.1
Azathioprine	2.8	2.8	2.1	3.3	6.1	1.4	3.4	3.7
Cyproterone acetate	2.8	2.8	2.5	3	3	4	3.4	14.5
6-Hydroxymelatonin	3	2.8	1.5	2.8	3.9	-0.5	3.4	2.2
Ketorolac	3.2	1.7	2.9	4.1	3.4	0.1	3.4	1.3
SP-600125	3.3	1.3	2.4	3	4	0.3	3.4	2.3
1,10-Diaminodecane	3.6	2.3	3.2	2.8	6.4	0.5	3.4	2.9
Pinacidil	3.7	2.5	1.8	5	4.7	2.1	3.4	6.4
Bromoacetylcholine bromide	4	2.6	4.4	2.6	2.9	-0.2	3.4	1.7
ABT-418 hydrochloride	4.1	4.2	3.2	6.8	4.9	1.8	3.4	2.1
(±)-SKF 38393, N-allyl-, hydrobromide	4.2	4.5	4.5	4.2	6.2	0.3	3.4	1.7
3-Aminopropionitrile fumarate	4.2	3	3	3.4	3.5	-0.4	3.4	1.5
Indirubin-3'-oxime	4.4	3	2	2.6	3.9	5.1	3.4	13.5
1-Allyl-3,7-dimethyl-8-p-sulfophenylxanthine	4.5	-0.6	0.1	0.7	4.7	1.8	3.4	2.2
Tizanidine hydrochloride	4.9	2.9	1.9	4.4	4	-0.2	3.4	0.3
Ganaxolone	3.1	1.2	2.7	2.4	4.4	-0.2	3.5	1.9
Caroverine	2.6	4.2	4.8	4.8	3.6	-0.1	3.5	4.2
Daphnetin	5	2.7	2.2	2.1	-0.1	0.3	3.5	0.9
1-benzoyl-5-methoxy-2-methylindole-3-acetic acid	5.2	3.5	6.4	6.7	5.1	0.2	3.5	0.8
Metrifudil	1.9	2.8	1.5	2.9	4.6	0.9	3.5	4.4
Aniracetam	2.3	2.3	2.7	2.9	4.6	1.9	3.5	3
Vancomycin hydrochloride	2.5	1.9	1.6	4	6.2	1.3	3.5	0.2
Oxaprozin	2.5	2.4	2.4	4.3	3.6	0.5	3.5	1.2
beta-Lapachone	2.7	2.7	1	3.7	3.7	0.9	3.5	0.9
Pyridostigmine bromide	2.7	3.1	2.2	4	4.1	0.2	3.5	2.3
(±)-2-Amino-7-phosphonoheptanoic acid	3.2	1.7	0.5	2.6	5.2	0.6	3.5	0.7
Mianserin hydrochloride	3.2	3.3	6.2	2.8	6.6	0.4	3.5	24.5
Amisulpride	3.2	5.2	3.7	4.1	7.4	-0.5	3.5	5.5
2,2'-Bipyridyl	3.3	2.4	2	3.4	3.3	0.9	3.5	2.5
L-741,626	3.3	3.4	2.2	3.8	3.9	2	3.5	17.2
3-Tropanyl-3,5-dichlorobenzoate	3.3	2	2.9	3.3	4.6	0.5	3.5	5.2
L-3,4-Dihydroxyphenylalanine methyl ester hydrochloride	3.4	2.4	2.5	2.4	4.8	1.2	3.5	2.6
Muscimol hydrobromide	3.6	4.8	2.4	2.7	3.3	0.4	3.5	0.4
Dobutamine hydrochloride	3.6	2.6	2.3	2.5	2.2	0.8	3.5	1.2
(±)-8-Hydroxy-DPAT hydrobromide	3.7	1.5	4.9	1.5	6.7	4.2	3.5	3.4
MNS	4	2.5	2.9	3.4	5.2	1.7	3.5	1.4
Levodopa	4	3.6	2.9	3.7	4.2	1.3	3.5	3.1
BIO	4.2	2.4	2.4	2.7	1.6	5.1	3.5	9.5
Dantrolene sodium	4.9	4.6	2.5	4.1	5.3	1.4	3.5	11.9
N,N-Dipropyl-5-carboxamidotryptamine maleate	6.3	5.6	5	2.6	4.8	1.7	3.5	-0.5
D-ribofuranosylbenzimidazole	6.3	2.2	3.1	3.2	3.2	-0.1	3.5	0.7
Carisoprodol	1.5	2.3	1.3	3.1	5	1.2	3.6	0
SMER28	6.7	2	2.8	2.3	4.2	2	3.6	11.8
Guanfacine hydrochloride	2.8	1.5	1.3	1.2	5	2.5	3.6	37.6
2-Methyl-5-hydroxytryptamine maleate	2.1	3.3	2.5	4.6	5.4	-0.1	3.6	2.3
CCG-2046	2.6	1.4	2.3	1.9	3.4	2.3	3.6	6
L-745,870 hydrochloride	2.8	1.2	0.9	2.8	3.1	1.3	3.6	18.6
Nimodipine	2.9	1.6	5.2	5.5	5.8	4.1	3.6	4.2
(±)-Bay K 8644	3	2.7	0.8	3.3	5.9	1.1	3.6	2.5
Prochlorperazine	3.1	4.4	1.8	5.1	2.7	-0.4	3.6	14.8
Haloperidol	3.3	3	3.1	2.3	3.5	1.1	3.6	65
SID-7969543	3.4	3.7	3	3.3	3.4	0.5	3.6	1.4
Terbutaline hemisulfate	3.5	1.3	0.7	4.8	5.9	11.6	3.6	13
Cefmetazole sodium	3.9	2.9	3.4	3.2	5.3	1	3.6	1.8
Amiloride hydrochloride	4.1	3.9	3.1	5	2.3	0.2	3.6	1.1
Ro 25-6981 hydrochloride	4.8	2.1	1.1	2.2	2	1.7	3.6	13
Tamoxifen	5	3.9	0.9	4	6.3	0.9	3.6	71.9
Alfuzosin hydrochloride	5.1	3.8	3.5	3	5.8	0.8	3.6	2.5
Gabaculine hydrochloride	5.1	1.5	1.6	1.7	7.7	0.6	3.6	0.7
Fluspirilene	5.1	2.5	1.2	1.4	3.4	7.2	3.6	40.2
Brefeldin A from Penicillium brefeldianum	6.6	2.2	0.7	3.1	5.8	0.7	3.6	6.1
ET-18-OCH3	3.3	2.9	2	3.8	3.7	5.4	3.7	11.1
Tulobuterol hydrochloride	5.7	2.3	5.1	5.1	7.7	1.7	3.7	4.4
S-(+)-Fluoxetine hydrochloride	1.7	0.8	0.4	2.7	1.6	0.8	3.7	44.7
AGK2	2.1	2	1.7	3.7	4.3	0.2	3.7	2.5
Nicardipine	2.1	1.6	0.4	3.5	3.4	6.6	3.7	4.4
Fluorouracil	2.4	3.3	2.6	3.4	4.8	2.1	3.7	1.6
N-Methyl-D-aspartic acid	2.9	2.3	5.1	2.3	3.4	0.1	3.7	-0.2
Stavudine	3	3.1	2.3	5	7	1.2	3.7	2
Nimesulide	3.2	2.7	1.9	2.7	4.8	1	3.7	8.5
Kynurenic acid	3.4	1.6	2.1	4.6	4.8	0.9	3.7	1.2
Dicyclomine hydrochloride	3.6	6.4	3.3	7.6	10.9	1.8	3.7	9.6
Methysergide maleate	3.9	3.6	3	5.6	5.8	1.2	3.7	9.5
Ibandronate sodium hydrate	4.1	3	3.5	3.5	5.2	1.1	3.7	2.9
(±)-SKF-38393 hydrochloride	4.3	2.3	2.1	2.5	6.3	0.9	3.7	1.8
Rauwolscine hydrochloride	5	4	3.7	2.5	4.7	1.4	3.7	3.4
Betaine	5.1	3.1	3.1	3	2.4	1.6	3.7	0.8
5,5-Diphenylhydantoin	5.3	3.2	3.2	3.4	4.4	1.4	3.7	1
Chloroquine	5.7	2.1	2.5	1.9	3	1.4	3.7	5
Cantharidin	6.1	0.1	1.6	1.7	8.9	0.4	3.7	1.8
Dihydrocapsaicin	6.4	6	6.4	4.7	6.4	-0.4	3.7	1.9
S(-)-Willardiine	3.3	2.2	4.2	4.1	6.5	1.2	3.8	0.9
(±)-alpha-Lipoic Acid	1.8	2.3	1.6	2.9	5.8	-0.5	3.8	-0.3
N-Methyldopamine hydrochloride	3.4	3	2.8	2.7	5.5	1.9	3.8	11.6
Procainamide hydrochloride	1.4	1.5	2.7	3.2	4.7	1.7	3.8	4.8
GW9662	1.9	2.1	0.7	2.6	4.7	1.6	3.8	4.2
Thioperamide maleate	2.1	3	2.5	2.6	2.6	-0.1	3.8	2
L-Histidine hydrochloride	3.2	2	2.2	3.5	5.7	0.2	3.8	2.7
Indatraline hydrochloride	3.3	1.7	1.6	2.7	2.6	0.9	3.8	21.8
MPEP	3.4	3.3	5.6	2.5	7.5	0.2	3.8	1.8
Tranylcypromine	3.7	3.3	3.4	4.3	5.2	0.9	3.8	2.5
3-Tropanyl-indole-3-carboxylate hydrochloride	3.8	2.7	1.5	2.9	5	1.2	3.8	6
Carvedilol	4.1	3.4	2.7	4	5.9	2.2	3.8	8.9
Ro 41-0960	4.5	2.8	0.7	3.7	5.7	0.7	3.8	8.8
Iofetamine hydrochloride	4.7	3.2	3.6	2.6	4.2	0.4	3.8	11.3
CyPPA	4.8	3.6	4.8	5	5.1	1.1	3.8	18.1
Mephetyl tetrazole	5.1	2.9	6.8	1.9	5.7	3.5	3.8	16.8
TPMPA	5.5	5.5	2.1	5.1	5.3	0.7	3.8	1.7
Tetrahydrozoline hydrochloride	7.1	2	4.1	2.3	5	-0.4	3.8	3.5
GR 113808	10.4	3.4	2.4	3	5.7	0.7	3.8	4.5
Imazodan	1	1.4	0.9	3.1	4.3	1.1	3.9	3.1
Colchicine	4.1	4.5	4.3	4.7	6.3	3.3	3.9	4.8
Levosulpiride	4.3	3.6	2.1	3.3	3.8	0.9	3.9	6.9
NSC 95397	4.2	2.6	2	5.2	7.3	1.7	3.9	3.3
L-Arginine	1.5	1.6	1.8	2	3.6	0	3.9	2
PAPP	1.9	4.3	3	4.5	4	1.8	3.9	19.1
Cytarabine	2.5	1.5	1.9	3.1	2.4	0.4	3.9	1.1
Allopurinol	2.5	6.6	4.3	4.7	7	2.4	3.9	4
Arecoline	2.7	1	0.9	1.5	3	1.3	3.9	95.8
Prazosin hydrochloride	2.7	2.2	2.4	2.5	2.3	0.6	3.9	6.2
Benazoline oxalate	2.8	2.6	3	4.2	5.4	1.9	3.9	3.5
8-(3-Chlorostyryl)caffeine	2.9	2.3	1.5	4.6	4.4	0.7	3.9	1.6
1-Aminobenzotriazole	3	1.9	3.1	3.4	4.3	-0.1	3.9	4.4
Lercanidipine hydrochloride hemihydrate	3.6	2.8	3.4	3.1	4.3	6.4	3.9	5.3
Sandoz 58-035	3.6	3.2	2.6	3.6	3.7	0.2	3.9	4
Rutaecarpine	3.7	2.6	2.7	2.7	4.7	2.1	3.9	4.6
Bay 11-7085	4	3.5	2.2	4	4.6	4.3	3.9	10.7
SC 19220	4.6	5.1	2.7	4.4	5.3	0.6	3.9	2.1
DL-threo-beta-hydroxyaspartic acid	5.7	3.5	2.3	1.4	6.1	-0.1	3.9	1.7
Dequalinium chloride hydrate	6.6	3.4	5.7	3	7.8	0.3	3.9	1.1
S(-)-Atenolol	1.7	1.6	1.7	2.3	3.6	0	4	2.7
6-Nitroso-1,2-benzopyrone	2.5	1.3	2.2	4.6	5.1	1.1	4	4.4
U-69593	2.8	1.3	2	3.3	4.9	-0.3	4	5.9
Fenofibrate	3.1	1.8	1.6	2.4	7	5	4	3.4
FAUC 213	3.1	2.6	3.5	3.1	4.8	1.8	4	11.5
Estrone	3.1	2.3	2.5	3.1	5.4	1.7	4	2
Glipizide	3.3	3.8	2.5	2.8	4.8	1	4	1.6
S(+)-Ibuprofen	3.6	2.9	2.7	2.9	9.1	3.7	4	1.2
Benzamil	4.1	3.4	4.5	4.7	4	1.8	4	3.6
(±)-Norepinephrine (+)bitartrate	4.5	4.4	3.5	3.3	5.2	2.1	4	3.3
Paromomycin sulfate	4.6	3.1	3.1	7.1	7	1	4	5.3
DL-erythro-Dihydrosphingosine	4.8	3	2.6	3.3	5.8	1.5	4	3.7
Rilmenidine	4.8	3.9	3.6	4.3	4.4	1.5	4	2.2
Paclitaxel	5.6	4.7	3.7	4.3	6.3	2.5	4	8.5
Nocodazole	1.8	2.1	3	3	5.3	5.3	4.1	6.3
Cimetidine	2.7	4.4	3.4	4.4	3.6	0.9	4.1	1
PPADS	2.8	1.9	3.7	3.5	5.7	1.4	4.1	3.3
Apresoline	3.4	4.3	2.5	3.9	5.3	1	4.1	0.8
Sulindac sulfone	3.4	0.8	1.1	3.8	4.7	0.3	4.1	-0.2
Metrazoline oxalate	3.5	4.8	2.2	2.7	5.7	1.5	4.1	11.4
Alaproclate hydrochloride	3.5	3.2	1.6	1.6	3.5	1.5	4.1	73.5
Furafylline	4.2	3.3	2.9	2.4	3.8	0	4.1	1.3
9-cyclopentyladenine	4.2	2	2.9	3.4	5.6	1.6	4.1	3.2
Tretinoin	4.5	2	3.1	2.6	3.3	1.3	4.1	1.9
5-(N,N-hexamethylene)amiloride	4.9	4.2	3.4	5.7	4.2	-0.3	4.1	1
alpha-Methyl-5-hydroxytryptamine maleate	6.6	3.3	5.1	6.6	6.3	-0.1	4.1	0
(+)-Quisqualic acid	3.3	0.7	2	3.5	4.2	0.8	4.2	0.9
NF 023	3.3	2.6	2.1	1.9	5.9	0.7	4.2	1.8
Piroxicam	5.9	2.6	5.3	3.5	7.1	1	4.2	1
1-Methylhistamine dihydrochloride	2.3	4.5	6.4	6.3	5.9	1.4	4.2	0.3
Reserpine	3.1	2.4	1.3	3	1.9	0.9	4.2	4
Minoxidil	3.3	2.5	2.7	2.7	5.8	1.2	4.2	4.2
NCS-356	3.6	2.6	1.6	3.2	6.1	-0.1	4.2	2.3
L-Buthionine-sulfoximine	4.1	4	3.3	4.6	4.3	1	4.2	1.2
(2S,1'S,2'S)-2-(carboxycyclopropyl)glycine	4.2	2.8	2.7	2.4	3.5	-0.1	4.2	2.5
Ritodrine hydrochloride	5.2	2.7	1.1	1.9	7.2	1.1	4.2	2.2
O-Phospho-L-serine	6.3	4.6	4.2	4.3	7.2	-0.3	4.2	1.9
R(-)-N-Allylnorapomorphine hydrobromide	6.5	1	3.2	1.1	8.6	0.4	4.2	0.4
S-(4-Nitrobenzyl)-6-thioguanosine	6.5	3.7	5	5.5	7.9	1.6	4.2	0.4
Quazinone	4	1.9	5.1	5.3	7.4	2.8	4.3	2.8
IMID-4F hydrochloride	6.1	3.6	4.8	5.3	6	3	4.3	29.1
7-Chloro-4-hydroxy-2-phenyl-1,8-naphthyridine	2.5	4.2	2	3.7	3.8	1.4	4.3	5
Efaroxan hydrochloride	2.7	4.6	5.6	5	14.3	1.7	4.3	4.9
Cilostazol	3.2	2	1	1.1	4.4	1.8	4.3	10.1
Chlorambucil	3.6	3.7	3.1	4	5.9	2.4	4.3	1.2
CCG-4986	3.7	3.9	6.4	1.7	6.4	1.6	4.3	1.3
Isonipecotic acid	3.7	2.7	3	3.7	5.3	0.1	4.3	2
3-deazaadenosine	3.8	3.9	2.7	4.7	5.4	0.9	4.3	4.6
(±)-2-Amino-4-phosphonobutyric acid	3.8	3.5	3	4	3.9	1	4.3	1.3
(S)-Propranolol hydrochloride	4	6.4	4.7	6.4	6.4	1.2	4.3	7.1
1-(5-Isoquinolinylsulfonyl)-3-methylpiperazine dihydrochloride	4.4	6.7	6.2	5.6	7.1	0.2	4.3	8.2
Sanguinarine chloride	4.6	2.7	2.6	3.6	8.1	2	4.3	16.9
Indomethacin	5.1	5.4	5.3	5.6	5.3	0.7	4.3	1.9
Demeclocycline hydrochloride	9.5	4.9	6.3	6.4	6.6	1.3	4.3	2.1
CK2 Inhibitor 2	15.7	7.3	8.1	6.3	7.4	1.7	4.3	35.1
Atropine methyl bromide	5.6	2.2	3.2	3	6.8	1.3	4.4	3
L-655,708	3	3	3.7	3.6	4	2.4	4.4	3.7
N,N,N',N'-Tetramethylazodicarboxamide	1.8	2	1.2	2	4	1.6	4.4	16.4
Amsacrine hydrochloride	2.2	2.7	1.7	2.3	3.1	0.8	4.4	3.2
Ancitabine hydrochloride	3.5	2.9	3.7	3.6	5.5	1.6	4.4	2
(±)-DOI hydrochloride	4	2.1	2.8	4.3	4.3	-0.3	4.4	4.1
U-73343	4.4	3	2.5	3	3.4	2.5	4.4	12.5
Pimagedine	4.5	3	3	3.6	4.3	1.1	4.4	1.9
Mexiletene hydrochloride	4.9	5.4	3.8	5.9	5.3	1.3	4.4	6.7
(±)-Atenolol	5.2	3.5	2.3	1.6	2.9	1.1	4.4	4.3
Diclofenac sodium	5.4	3.2	2.6	1.8	2.4	5.2	4.4	8.2
Domperidone	5.4	2.3	3.9	3.3	9.2	4.2	4.4	22.6
AA-861	5.7	2.5	3.4	4.6	6	1	4.4	8.4
1,3-Dipropyl-7-methylxanthine	5.9	5.2	3.9	2.9	7.1	0.6	4.4	3
S(-)-Pindolol	2.9	2.3	3.3	3.2	4.9	1.6	4.5	4
Benzamide	3.2	5.7	4.5	5.4	4.5	2.7	4.5	3.5
Tyrphostin AG 835	2	1	1.2	4.2	4	2.6	4.5	12.1
4-Hydroxybenzhydrazide	2	2	0.7	3.3	5.1	-0.1	4.5	1.5
N-Desmethylclozapine	2.6	6	2.7	1.6	3.3	1.3	4.5	16.7
alpha-Methyl-DL-tyrosine methyl ester hydrochloride	2.9	2.9	2.9	3.4	5.9	1.1	4.5	1.8
Betamethasone	3.2	2.9	2.3	1.8	4.5	1.3	4.5	4.3
1,3-Dimethyl-8-phenylxanthine	3.3	2.5	3.4	5.3	3.2	0.8	4.5	2.1
Tyrphostin 51	3.5	3.2	2.3	2.8	6.7	3.1	4.5	16.9
p-Fluoro-L-phenylalanine	4.3	4.9	4.2	4.5	4.8	1	4.5	2.6
Lansoprazole	4.6	3.3	5.3	6.6	6.7	1.9	4.5	10.2
Procaine hydrochloride	5.2	1.7	1.8	2.2	5.6	0.2	4.5	4.7
5-Bromo-2'-deoxyuridine	5.9	2.6	1.9	2.3	3.2	0.6	4.5	2.4
Salmeterol xinafoate	5	4.8	4.3	3.1	4.8	0.7	4.6	13.1
Urapidil hydrochloride	2.7	2.1	2.5	4.7	4.7	1.9	4.6	6.9
Oxymetazoline hydrochloride	3.3	1.5	2.1	2	2.8	0.2	4.6	4.1
trans-(±)-ACPD	4.3	4.3	3.6	1.9	8.4	0.4	4.6	1.4
Metaproterenol hemisulfate	4.4	3.1	2.9	2.5	5.2	1.4	4.6	7.6
Chlormethiazole hydrochloride	4.5	3.5	4.3	3.9	5.4	2.1	4.6	3.6
Formoterol	6	5.2	8.2	8.7	19.1	3.1	4.6	9.8
(-)-cis-(1S,2R)-U-50488 tartrate	8.6	6.7	6.2	6.3	5.7	0.7	4.6	23
DM 235	3	2.8	1.2	3.6	6	0.4	4.7	2.9
Sulindac	2.9	3.5	6.3	2.4	5.7	1.3	4.7	1.6
GR 127935 hydrochloride hydrate	3.5	3.9	4.3	2.5	4.3	3.7	4.7	10.5
Tyrphostin AG 698	1.1	0.7	1.5	1.4	4.1	1.7	4.7	9.2
SKF 89626	3.2	2.5	4.2	4.7	7	1.8	4.7	1.6
AFMK	3.8	3.5	4.1	4.9	5	0.7	4.7	3.3
R-(-)-Desmethyldeprenyl hydrochloride	3.8	3.7	3.6	5	6.5	2.7	4.7	1.8
erythro-9-(2-Hydroxy-3-nonyl)adenine hydrochloride	3.9	3.8	2.2	3.5	4.7	2.3	4.7	5.8
(±)-CPP	4	2.8	0.1	0.8	3.6	0.2	4.7	2.3
Parthenolide	4.4	3.7	2.5	3.7	6.2	1.6	4.7	6.6
SNC80	4.9	2.7	2.7	2.6	6.8	-0.3	4.7	2.8
5-Azacitidine	5.2	2.8	3	4.2	3.7	1.9	4.7	2.2
(±)-Taxifolin	5.2	0.8	1.2	3.1	3.8	0.6	4.7	4.9
1,5-Isoquinolinediol	5.3	4.4	5.1	2.7	8.8	0.5	4.7	5.1
(-)-MK-801 hydrogen maleate	6.9	3.7	2.4	4.7	4.7	0.3	4.7	2
L-azetidine-2-carboxylic acid	7.7	7.7	5.8	6.4	7.2	1.4	4.7	4.5
Loratadine	3.2	2.5	1.8	1.1	0.3	8.8	4.8	6.1
ML 10302	2.2	1.6	1.9	3.9	4.6	0.9	4.8	3.3
R(+)-SCH-23390 hydrochloride	3.1	3.5	3.9	4.4	3.9	1.3	4.8	17.3
Spironolactone	3.3	2.2	2.7	3.5	5	1.8	4.8	8.8
Theophylline	4.3	4.6	5.7	3.2	5.9	1.8	4.8	2.4
R(-)-N6-(2-Phenylisopropyl)adenosine	4.3	0.5	0.9	2.6	4.8	8.3	4.8	4.8
GR-89696 fumarate	4.6	5.6	1.7	4.2	7.5	1.6	4.8	11.5
Tetraethylammonium chloride	6.4	4	3.9	5.9	7.3	2.7	4.8	3.6
Epinastine hydrochloride	7.1	7.5	7.6	4.8	5.5	1.6	4.8	5.9
Iproniazid phosphate	8.1	4.6	3	2.7	5.7	1	4.8	5.6
1,7-Dimethylxanthine	3.8	3.9	5.2	5.3	8.1	1.5	4.9	3
Succinylcholine chloride	3.5	4.2	2.6	3.3	5.2	1.8	4.9	3.6
Ketotifen	4	2.6	2	2.9	4.6	3	4.9	31.9
Urapidil, 5-Methyl-	4.3	1.6	0.7	4.5	2.3	0.2	4.9	9.5
A3 hydrochloride	4.8	3.5	3.8	4.4	6	1.3	4.9	21.6
Acetamide	5.3	2.9	-0.4	2.1	4.4	0.3	4.9	-0.4
Moclobemide	5.9	5.2	5.3	8.5	6.6	0.5	4.9	5.6
Dephostatin	6.2	5.5	0	0.4	4	0	4.9	-0.2
Pirenzepine dihydrochloride	7.7	4.6	2.3	3.1	5.2	1	4.9	0.6
5,5-Dimethyl-1-pyrroline-N-oxide	1.8	4	3.4	3.1	6.2	1.4	5	3.2
Triflupromazine hydrochloride	1.9	2.3	3.1	2.5	6.6	9.5	5	136
H-8 dihydrochloride	2.9	5.6	6	9.7	7.1	1.7	5	2.6
1-(4-Hexyphenyl)-2-propane-1-one	3.5	3.3	3.3	5.6	5.3	0.7	5	3.1
Rufinamide	3.7	2.5	1	2.6	5.1	0.9	5	1.6
Fenoterol hydrobromide	4.1	1.9	2.2	4.9	5.6	2.2	5	3.3
5-Nitro-2-(3-phenylpropylamino)benzoic acid	4.2	1.8	2.7	2.9	4.3	1.5	5	16.8
AS-604850	4.4	2.8	2.4	3	2.7	1.9	5	9.3
N-Oleoylethanolamine	5.5	4.5	2.3	5.7	6.4	2.1	5	3.9
S(-)-p-Bromotetramisole oxalate	6.3	6.5	5.7	5.7	17.6	-0.7	5	9.3
Kainic acid	6.9	4.5	6.7	5.8	10.1	1.6	5	2.1
trans-Azetidine-2,4-dicarboxylic acid	4.9	3.9	3.1	3.2	6.8	0.9	5.1	3.4
TPCK	2.5	1.3	2.5	2.3	5.5	2	5.1	7.1
7,7-Dimethyl-(5Z,8Z)-eicosadienoic acid	3.6	2.6	3.6	3	6.2	1.5	5.1	3.8
Tryptamine hydrochloride	3.9	6	4.9	5.6	4.8	2	5.1	3.5
Salbutamol sulfate	3.9	3.4	3.8	4.5	9.6	1.8	5.1	3.9
Hydrocortisone	4.1	3.6	2.4	4.5	5.5	1.2	5.1	5.6
Memantine hydrochloride	4.6	4.8	4.4	4.1	3	1.8	5.1	49.9
Tocainide hydrochloride	4.8	4.1	2.6	1.7	7.3	8	5.1	0.9
1-(m-Chlorophenyl)-biguanide hydrochloride	5.3	6.6	6.8	7.2	7.5	3.2	5.1	2.4
Edrophonium chloride	6.9	21.3	25.1	5.9	34.8	3	5.1	4.4
(±)-Baclofen	7.6	4.8	1.5	3	6.3	0.3	5.1	3
Molsidomine	8.3	2.7	2.3	3.3	6.6	-0.2	5.1	0
Alloxazine	1.5	0.8	1.7	2	4.7	2	5.2	2.6
DL-Stearoylcarnitine chloride	3.2	2	2.5	5.3	4.3	1.9	5.2	3.6
(±)-Octoclothepin maleate	3.3	3.4	3.6	4	5.4	2.4	5.2	56.4
VGX-1027	3.5	5.4	1	2	4.8	0.1	5.2	1.4
N-Ethylmaleimide	3.8	2.9	3	1.6	6.1	1.9	5.2	8.7
S-(-)-Carbidopa	3.9	2.8	4.8	3.9	4.6	3.1	5.2	1.7
Tolazamide	4	1.2	0.6	4	2.7	-0.7	5.2	0.6
Astaxanthin	4.5	3.6	4.8	5.7	5.4	4	5.2	4.1
NAN-190 hydrobromide	4.7	0.8	0.6	4.8	1.6	0.5	5.2	8
HA-1004 hydrochloride	5.9	3.7	7.5	4.7	8.1	2.5	5.2	6.4
Idazoxan hydrochloride	6.8	3.9	3.9	9	7.3	2.1	5.2	4
L-2-aminoadipic acid	8.7	6.9	4.3	6	6	2.1	5.2	2.7
Bumetanide	10	3.7	2.8	3.7	10.5	0.6	5.2	1.8
Xylometazoline hydrochloride	3.5	2.8	3	4.4	6	1.9	5.3	9.3
Supercinnamaldehyde	2.5	1.3	1	3.3	3.6	1.7	5.3	3.4
N6-Phenyladenosine	3.1	4.2	2.4	4.4	5.1	3.4	5.3	3.5
L-765,314	3.2	4.4	2.7	2.9	4.5	2.6	5.3	24.8
Fenspiride hydrochloride	3.4	3.2	5.1	3.2	7.8	7.9	5.3	6.5
UCL 2077	3.5	1.8	2.5	2.9	3.5	7.2	5.3	5.2
Milrinone	3.8	3.8	2.4	9.7	6.7	0.8	5.3	5
Ivermectin	4.3	3	2.2	3.4	4.8	1.9	5.3	3.1
CHM-1 hydrate	4.6	5.9	6.9	11.3	11.2	4.4	5.3	3.3
Diethylenetriaminepentaacetic acid	4.9	6.5	7.3	6.4	5.7	2.3	5.3	0.9
Tetracaine hydrochloride	8.7	8.1	6.4	5	6.3	-0.3	5.3	14.9
Etoposide	6.1	5.3	4.1	7.8	6.8	1.5	5.4	2.8
Clemastine fumarate	6.5	2.2	4.3	5.7	4.3	0.6	5.4	41.4
Amperozide hydrochloride	4	2.8	2.3	1.9	6	4.4	5.4	35.4
Emodin	2.7	4.5	1.1	3.6	2	2.7	5.4	16.8
Ziprasidone	3.8	3.3	3.7	5.7	6	-0.3	5.4	13.9
Sepiapterin	3.9	3.7	1.8	5.8	6.8	0.5	5.4	-1
Nialamide	4.1	3.6	2.5	5.4	6	1.3	5.4	4.5
Moxonidine hydrochloride hydrate	4.2	2.8	2.9	3	6.7	1.7	5.4	6.7
2-Chloro-2-deoxy-D-glucose	5.8	6.1	3.1	5.6	6.7	1	5.4	4.3
SKF-89145 hydrobromide	8.9	2.2	2.4	2.8	5.1	2.1	5.4	8
Mizoribine	2.2	2.5	3.2	2.7	5.5	1.7	5.5	2.1
Sotalol	3.6	3.2	3	3	6.8	1.1	5.5	3.8
Budesonide	3.9	3.3	1.3	2.6	4.4	2.9	5.5	19.1
Ketanserin	2	2.9	1.1	4.3	2.5	3	5.6	10.8
Tyrphostin AG 555	2.4	1.1	2.7	2.1	4.6	2.6	5.6	15.1
L-allylglycine	4.2	3.9	5.1	5.7	6.3	2.4	5.6	4.3
Isoguvacine hydrochloride	4.9	3.1	2.8	4.4	6.2	1.8	5.6	1
Hydroquinone	5.9	3.7	6.2	2.5	8.1	3.2	5.6	4.2
N-omega-Methyl-5-hydroxytryptamine oxalate salt	6.2	4.9	5.3	6	7	2.9	5.6	2.3
BBMP	6.9	7.3	5.9	4.7	6	0.1	5.6	2.4
Guanidinyl-naltrindole di-trifluoroacetate	1.9	1.9	1.3	2.4	5.7	2.5	5.7	2.4
Salbutamol sulfate	8.4	3.4	4.2	2.4	7.8	3.2	5.7	6.3
Phorbol 12-myristate 13-acetate	1.5	1.6	1.4	2.6	6.7	3.1	5.7	7.3
Theophyllamine	4.4	3.9	1.6	4.5	4.9	1.4	5.7	3.5
CPNQ	3.7	2.6	2.8	1.5	7.1	4.8	5.8	9.2
Beclomethasone	2.9	0.8	1.9	2.1	4.3	3.6	5.8	9.2
(±)-Propranolol hydrochloride	2.8	2.3	1.8	1.8	6	0.9	5.8	17.7
AMG 9810	4.3	1.2	3.1	2.6	9.5	0.1	5.8	3.1
BF-170 hydrochloride	4.3	3.2	2.3	2.6	8.5	6.1	5.8	18.2
Aminocaproic acid	5.2	1.9	0.1	1.7	5.8	0.6	5.8	2.1
Primidone	5.7	6.2	4.2	7.6	5.4	2.4	5.8	4.5
GR 79236X	8.7	6.2	5.7	1.9	6.9	0.9	5.8	7.6
2,4-Diamino-6-pyrimidinone	4.5	2.7	3.6	3.9	7.2	0.2	5.9	3
Triprolidine hydrochloride	4.1	1.3	1.3	2.7	2	3.7	5.9	2.8
Chlormezanone	5.7	5.5	4.7	5.7	6	2.3	5.9	3.1
Chelerythrine chloride	7.1	4.7	1.9	2.8	4.2	1.5	5.9	9.6
Daidzein	7.2	4.2	6.4	11.9	11.8	1.5	5.9	6.9
Papaverine hydrochloride	2.6	1	1.3	1.7	5	4	6	2.1
SB-366791	2.8	2.8	2	2.8	1.9	1.7	6	15.3
Hypotaurine	3.2	4.7	5.3	5.8	6.3	2.3	6	3.6
Adenosine	4	2	1.8	1.5	2.4	2.4	6	13.2
Y-27632	6.1	7.8	3.5	5.3	11.5	5.3	6	3.2
SD-169	8.3	6.8	6.8	6.7	6	3.9	6	5.1
IRAK-1-4 Inhibitor I	2.6	2.6	0.9	3.3	11.2	1.2	6.1	4.8
R(-)-Propylnorapomorphine hydrochloride	3	2.7	2.4	4.2	4.8	1.4	6.1	4.3
MRS 1845	3.3	2.6	1.7	1.5	0.7	5.8	6.1	3.4
Ciproxifan hydrochloride	3.7	2.4	1.7	2.6	3.5	2.7	6.1	24.8
NSC-724771	3.9	1	2.6	3.6	2.5	0.9	6.1	14.4
N6-2-(4-Aminophenyl)ethyladenosine	4.7	2.5	2	1.6	5.9	3.8	6.1	3
Pancuronium bromide	5.5	1.6	3.4	2.6	6.5	0.8	6.1	7.7
p-MPPI hydrochloride	5.5	3.3	1.8	2.2	6.4	1.9	6.1	7.8
Progesterone	6.2	5.1	4.5	4.5	5.4	0.4	6.1	13.5
U-75302	2.1	1.8	0.8	3.2	0.7	-0.2	6.2	20.1
Ebselen	2.7	2.1	1.7	2	3	2.3	6.2	34.9
Spermidine	3	0.6	0.2	2	5.5	5.2	6.2	4
6,7-ADTN hydrobromide	3.8	2.6	3.9	3.3	7.1	0.8	6.2	7
R(-)-2,10,11-Trihydroxy-N-propylnoraporphine hydrobromide	4.6	2.1	3.5	4.4	3.7	1.4	6.2	4.1
Imperatorin	8.5	3.8	4	10	8.6	9.6	6.2	33.6
Nylidrin hydrochloride	9.6	6.4	6.5	5.9	6.6	6.1	6.2	29
BW 723C86	3.2	3.2	2.4	2.9	3.6	2.8	6.3	72.1
AG-1478	3.2	2.7	2.3	2.9	6	1.5	6.3	6.8
Ketoconazole	4.5	2.1	2.8	4.1	5.7	2.1	6.3	14.4
(±)-Vanillylmandelic acid	5.8	4.1	4.1	4.9	8.8	2.5	6.3	3.9
HA-100	4.6	2.3	4.9	2.7	5.9	0.6	6.4	5.7
ST-148	4.5	0.8	1.4	1.8	6	0.1	6.4	33.3
Oleic Acid	8	5.6	7	4.7	5.4	1.9	6.4	1.7
Cortexolone	3.1	2.1	2	4.4	4.8	3.9	6.5	15.4
JL-18	4.9	2.1	1.3	1.8	5	-0.1	6.5	11
Pyrilamine maleate	1.8	1.4	1.4	2.5	3.2	3.4	6.6	6.7
Tranilast	3.1	1.5	0.6	0.8	2.5	6.6	6.6	6.6
SB 242084 dihydrochloride hydrate	3.7	2.6	2.1	2.1	2.4	2.4	6.6	16.8
Linopirdine	5	3.4	6.2	7.6	13.8	1.5	6.6	12.5
Org 24598 lithium salt	5.3	5.1	4.3	7.1	7.7	2.1	6.6	7.5
LFM-A13	6.1	4.7	4.4	3.2	3.8	6.9	6.7	3.1
Tiapride hydrochloride	4.5	3.2	4.4	1.4	5.4	1.8	6.7	3
TMB-8 hydrochloride	8.2	7	6.4	6.4	19.7	3.3	6.7	28
Doxazosin mesylate	3.3	2.1	2.2	3.7	3.8	3.3	6.8	8.4
Naloxonazine dihydrochloride	4.1	6.5	3.6	6.7	7.3	0.6	6.8	3.5
TMPH hydrochloride	4.2	2.6	0.8	1.6	6.3	2.5	6.8	19.2
Naloxone benzoylhydrazone	4.4	4.5	5.1	3.3	11.4	1.3	6.8	4.1
N-Acetylprocainamide hydrochloride	4.8	0.8	-0.3	2.1	5.4	0.3	6.8	1.8
Apigenin	4.8	4.2	2.5	2.7	6.4	5.2	7	14.6
Methylergonovine maleate	2.8	3.2	1.9	2.2	4.2	3.7	7.1	12.1
2-Cyclooctyl-2-hydroxyethylamine hydrochloride	4.4	1.6	3.4	4.4	8.8	2.9	7.1	14.6
cAMP	5.4	3.7	0.3	2.3	6.1	0.7	7.1	1.1
CGS-12066A maleate	6.7	7.2	5.9	5.8	8.6	0.9	7.1	4.2
S(+)-Isoproterenol (+)-bitartrate	8	6.3	6.9	5.6	12.7	1.4	7.1	10.5
Esomeprazole magnesium	4.1	2	2.3	2.8	6	3.4	7.2	8.9
Zidovudine	4.6	5.4	5.4	5.4	7.3	1	7.2	5.3
CV-3988	7.9	4	3.4	5.7	5.6	2.4	7.3	3
Methotrexate	5.1	4.9	3	3.4	7.6	0.2	7.3	3.3
2-Methoxyestradiol	4.5	3	2.7	3.9	9.3	2.8	7.4	10.9
(+)-Bromocriptine methanesulfonate	6.7	5.7	6.1	8.4	7.2	2.2	7.4	9.2
Isotharine mesylate	7	5.5	4.2	4.6	3.3	2.7	7.4	6
Rotenone	2.9	1.8	1.5	5	5.7	3	7.5	5.9
BU224 hydrochloride	3.9	2.3	0.3	2.8	5.7	0.5	7.5	2.1
Nortriptyline hydrochloride	2.1	4.3	1.2	3.2	5	5.3	7.7	109.9
(-)-Perillic acid	4.5	4	3.7	5.2	10	3.5	7.7	1.1
S15535	1.3	0.9	-0.2	2.1	0.9	0.3	7.8	6.5
N6-Cyclopentyladenosine	2.1	2.1	1.4	1.8	5.9	12.9	7.8	11.3
Dextromethorphan hydrobromide monohydrate	4.8	3.4	2.5	1.8	5.7	1.8	7.9	20.3
Putrescine dihydrochloride	3.7	7	12.5	8.5	7.2	0.4	8	6.2
1-Methylimidazole	5.7	4.3	5.9	6.3	42.7	1.7	8	6.9
Benzamidine hydrochloride	7.4	3.2	4.5	5.6	8	7.2	8	3.4
Tyrphostin AG 494	2.2	2.5	3.2	2.3	4	5.9	8.1	30.1
4-Hydroxyandrostenedione	4.7	2.6	2.9	5.6	4.8	4.1	8.1	13.6
Nilutamide	4.9	0.4	0.5	4.2	5.9	7.1	8.1	5.1
3-Iodobenzylguanidine hemisulfate	6.2	4.1	2.2	5.7	9	3	8.1	1.9
Promazine hydrochloride	6.6	4.9	4.3	1	6.9	3.9	8.1	137.3
Tyrphostin B42	3.8	3.4	2.5	2.2	5.4	3	8.2	58.1
Bicalutamide	3.9	3.1	3.1	3.7	4.8	3.2	8.2	29.3
Myricetin	7.2	5.1	5.2	3.2	7.9	2.7	8.4	15.6
5-Aminovaleric acid hydrochloride	23.9	5.4	6.4	5.7	6	0.6	8.5	2.6
CGS-21680	5.4	-0.5	-0.1	2.6	4.9	0	8.6	-0.5
LP44	7.4	1.3	1.2	1	5.1	2.4	8.6	87.6
rac-2-Ethoxy-3-octadecanamido-1-propylphosphocholine	5.2	1.7	2.6	3	6.6	4.8	8.7	58.1
Camptothecin	7.7	7.4	23.1	4.9	12.9	8	8.7	4.1
CNS-1102	2.4	1	0.8	3.4	0.6	3.7	8.8	102
ABT-702	2.6	2.3	0.6	5.1	8.7	4.6	8.8	14.1
ATPO	3.9	4.4	6.1	7	7.5	3.1	8.8	1.5
PD-098059	4.1	3.6	4.4	5.8	7.1	5.5	8.8	16.6
Paroxetine	5.6	3.4	5	6.2	7.1	0.8	8.8	73.4
Phenylephrine hydrochloride	2.5	2.3	1.3	2.3	5	8.4	8.9	12.8
17alpha-hydroxyprogesterone	4.9	1.7	3.1	3	6.5	1.2	8.9	5.3
(-)-Epinephrine bitartrate	6	6.7	6.5	8	11.8	3.2	8.9	21
5'-N-Ethylcarboxamidoadenosine	3.1	6.3	3.3	6.9	13.7	8.7	9	16.4
1,4-PBIT dihydrobromide	3.3	4.3	3.9	4.1	7.8	0.8	9	19.6
3,4-Dihydroxyphenylacetic acid	3.6	3.8	3	3.6	7.3	3.5	9	2.2
Disopyramide	7.6	6.4	6.9	5.4	16.7	10.6	9	6
Ranolazine	2.9	3.2	3.1	4.1	8.1	2.9	9.1	14.6
Fluoxetine hydrochloride	1.7	1.4	0	2	3.4	3.2	9.2	27.2
Isoprenaline hydrochloride	3.6	5.9	1.2	7.2	3.6	7.2	9.2	5.8
Tyrphostin 47	6.9	5.6	4.5	11.6	7.4	4.7	9.2	55.4
Orphenadrine hydrochloride	7	3.9	3.7	2.9	9.4	1.9	9.2	62.3
R(-)-Isoproterenol (+)-bitartrate	2.1	2.1	1.6	1.9	3.6	8.5	9.4	5.1
IC 261	4.6	2.7	1.9	3.2	5.4	4.6	9.4	14.5
Lorglumide sodium	7.2	6.8	6.3	5.5	7.7	3.9	9.5	27.4
SB 222200	3.5	1.3	0.6	1	5.9	9.6	9.8	8.4
2,6-Difluoro-4-[2-(phenylsulfonylamino)ethylthio]phenoxyacetamide	6.2	3.2	1.7	2.5	8.5	9.7	9.8	29.2
Bethanechol chloride	3	1.8	2.4	2.3	5.3	4.6	10.1	75.9
FPL 64176	2.6	2.1	2.7	6.1	11.8	5.2	10.2	19.5
Metergoline	3.6	1	1.1	3.2	6.8	3.6	10.4	32.5
Loperamide hydrochloride	4.2	3.5	3.8	4	4	6.1	10.6	124.4
Methiothepin mesylate	3.2	2.9	1.9	1.2	5.7	1.8	10.7	62
(-)-Physostigmine	6	4.4	1	8.4	10	4.9	10.7	7.1
2-Chloroadenosine	3.3	2.6	4.9	2.3	18.5	4	10.8	11.1
N-Bromoacetamide	8	5.4	6.2	11.4	6.2	4.3	10.8	51.1
Cyproheptadine hydrochloride	5	3.1	2.8	1.2	5.6	0.8	10.9	99.2
Estradiol	5.2	5.3	4	3.7	4.1	5.6	10.9	11.8
(-)-Isoproterenol hydrochloride	3.3	3.9	2.5	3.2	3.5	3.2	11	4.5
Amitriptyline hydrochloride	3.7	3.8	4.7	5.5	7.5	13.4	11	115.8
Mifepristone	12.1	4.4	6.6	2.9	3.5	4.6	11.1	26.7
SCH 58261	2.1	2.4	2	3.2	7.3	7.7	11.7	12.5
L-750,667 trihydrochloride	5.4	4.4	2	3	7	2.4	11.9	30.4
SB 205384	3.7	2.5	2.4	5.7	7.4	8.5	12.2	7.7
Mitotane	10.6	4.3	5.7	5.9	6.8	4.2	12.2	12.3
Flutamide	3	0.8	1.4	5	5.4	7.4	12.4	25.5
S-Ethylisothiourea hydrobromide	7.4	5.1	4.5	8.9	13	9.9	12.6	4.4
Taurine	8.3	5.4	7.2	4.4	6.6	5.4	12.9	4.5
3-(1H-Imidazol-4-yl)propyl di(p-fluorophenyl)methyl ether hydrochloride	2.4	2.6	4.4	2	4.1	7	13.2	115.6
MHPG piperazine	4.7	3.5	2.2	4.2	6.1	9.1	13.2	3.7
AS-252424	1.8	2.2	1.5	2.8	4.9	12	14	47.2
Raloxifene hydrochloride	3.3	6.4	5.7	3	8.7	11.5	14.2	27.6
O6-Benzylguanine	37.6	15.7	4.7	26.3	11.7	12.9	14.6	8.8
Tomoxetine	3.6	2.6	3.2	4.1	5.7	1.8	15.8	103
Nomifensine maleate	2	1	0.7	3.2	5.8	12	16.5	107.4
DAPH	3.8	3	0.9	5.2	6.2	13.5	16.7	39.9
Guvacine hydrochloride	4.6	3.8	14.9	8.1	11.3	10.4	16.8	9.8
Protriptyline hydrochloride	4.7	4.3	4.1	6.4	10.8	6.6	16.8	201.7
D-Cycloserine	10.7	7.2	5.8	7.9	19.7	3.8	17	3.4
Sertraline hydrochloride	2.1	2.3	3	3.5	3.1	23.4	17.1	108.2
(±)-Methoxyverapamil hydrochloride	6.1	3.5	2.1	3.8	5.2	13.2	17.2	61.6
(R,R)-cis-Diethyl tetrahydro-2,8-chrysenediol	3.4	2.1	3	5.6	9.1	19.5	18.1	14.3
Trimipramine maleate	4.5	2.6	2	2.4	4.1	12.7	18.1	118.6
PD-169316	0.3	1.8	2.6	4	5.4	10.8	18.3	22.8
Flupirtine maleate	3.3	3.7	2.1	2	6.3	13.9	18.4	26.1
Morin hydrate	4.7	3	3.1	3.7	4.6	7	18.5	52.6
LY310762	2.8	4.2	3.1	4.9	14	12.2	18.6	50.1
Ifenprodil tartrate	7.2	5.8	7.5	6.4	16.1	11	19	76.6
Ro 8-4304	7.1	3.4	1.3	1.8	7.2	4	19.4	57.7
RX 821002 hydrochloride	10	9.7	6.5	8.7	9.3	2.9	19.4	7.5
GW-5074	4.5	1.9	2.7	4.2	11.8	16.5	20.1	63.2
NNC 55-0396	4.6	3.1	3.5	4	6.4	13.8	20.4	119.5
Verapamil	2.5	1.3	0.9	2.2	0.7	16.2	20.6	87.4
Maprotiline hydrochloride	2.2	1.8	1.5	2.5	3.3	5.4	22.1	74.7
Quinacrine	5.9	3.3	2.7	4.8	19.9	26.5	22.6	46.6
Fluvoxamine maleate	4.9	4.4	3.5	4.8	8	7.9	23.3	104.5
Calcimycin	1.5	1.1	0.4	4.4	9.3	29	24.4	49.6
2,4-Dinitrophenyl 2-fluoro-2-deoxy-beta-D-glucopyranoside	3	2.9	3.2	4.6	9.9	18.2	25.4	60.7
GW2974	4.4	3	4.3	5.1	12.5	20	27.3	51.1
(±)-Ibotenic acid	7.6	6.6	6.7	4.8	14.1	14.6	27.7	17.6
Forskolin	2.3	3.7	2.4	7.3	26.2	10.9	29.2	30.8
N6-Cyclohexyladenosine	9.2	7.4	7.6	3.3	11.3	4.8	29.4	7.7
Oxotremorine sesquifumarate salt	2.7	4.3	3.8	8.8	26.8	19.5	32.1	55.9
Niclosamide	3.5	2.7	4	22.7	36.9	26.3	32.2	33.4
1-(4-Chlorobenzyl)-5-methoxy-2-methylindole-3-acetic acid	4.2	2.7	1.4	5.2	6	27	33.7	27.7
p-Iodoclonidine hydrochloride	4	6.3	2.4	6.1	24.9	35.8	34.6	108.8
Semaxanib	7.2	6.6	5.4	7.7	11.4	28.9	34.7	96.4
SU 4312	3.4	2.6	2.7	5.7	12.2	16	36.6	39
Ellipticine	3.5	5.5	2	8.7	17.3	37.4	37.9	39.6
Tyrphostin AG 879	5.2	3.5	2.7	11.2	26.6	28.6	39.7	111.2
Tyrphostin A9	3	3.2	2.2	14.8	33.9	28.1	41.5	121.1
Arecaidine propargyl ester hydrobromide	4	2.9	4.6	10.4	40.7	42.5	58.7	95
SR 59230A oxalate	3.7	2.2	3.3	12.4	12.2	7	59.7	129.4
SU 6656	3.7	3.6	4.2	6.4	39.9	75.5	94	115.4
AC-93253 iodide	2.6	4.3	3.9	11.5	33.4	74.9	97.4	245.9
P1,P4-Di(adenosine-5')tetraphosphate triammonium	3.1	1.9	2	3.3	74.9	116.8	124.2	186
Dipyridamole	3.2	3.3	4	5.9	21.8	107.4	124.4	262.8
2-Methylthioadenosine triphosphate tetrasodium	2.4	2.1	12	35.6	105.3	123.3	136.5	188.6
Spiperone hydrochloride	4.4	2.7	4.8	10.2	203.2	166.2	144.9	176.3
OXA-22	5	9.6	15.8	83.8	157.1	134.3	146.8	181.8
SB 216763	4.1	2.2	3.2	9.4	36	140.5	153.1	109.2
2-Chloroadenosine triphosphate tetrasodium	10.3	21.6	67.4	122.4	148.5	168.9	159.2	222.9
Acetyl-beta-methylcholine chloride	4.5	3.3	2	16.5	132.2	146	168.4	228.4
Thapsigargin	4	3.9	3	6.2	177.6	165.6	182.1	188.9
2-(Methylthio)adenosine 5'-diphosphate trisodium salt hydrate	24.8	65.3	127.4	188.9	249.2	179.8	189.4	224.3
(±)-Muscarine chloride	5.2	1.8	3.8	24.6	120.9	165.6	193.6	240.1
Carbachol	4.7	6.1	2.8	17.1	105.1	199.3	204.5	260.9
Oxotremorine methiodide	4.5	0.8	10.2	72.3	215.6	280	242.3	282.2
4-Amino-1,8-naphthalimide	7.4	7.2	11.3	19.9	79.3	226.8	245.1	209.4

## Sheet: Fig 1E 
Fig. 1E Dose-dependent activation of TPC2 by LyNaV in whole cell recordings
LyNa-VA1.1
concentration (µM)	0	10	20	50	100	200
current density (pA/pF)	11.5339	14.2797	16.3729	72.1017	144.729	155.559
	8.44628	--	26.1322	73.3967	150.116	157.372
	7.84158	--	46.3465	148.386	200.812	161.653
	16.4261	27.1739	35.0522	75.6	111.696	112.174
LyNa-VA1.2
concentration (µM)	0	5	10	20	50	100	200	400
current density (pA/pF)	12.5124	10.3471	14.5785	24.0331	89.8595	240.859	297.455	--
	6.56637	4.75221	6.45133	8.69912	25.0088	94.6372	239.381	245.487
	3.42453	3.36792	2.84906	7.08491	25.4245	96.3302	181.434	193.066
	5.57391	5.88696	8.54783	17.3826	76.3478	256.8	429.652	464.052
Carbamazepine
concentration (µM)	0	5	10	20	50	100	200	400
current density (pA/pF)	7.81818	8.01818	8.22727	8.57273	8.8	7.69091	7.46364	8.10909
	9.10909	9.07273	9.22727	9.16364	8.75455	8.97273	9.85455	8.75455
	5.94545	6.64545	5.43636	6.41818	6.07273	5.51818	6.16364	7.1
LyNa-VA2.1
concentration (µM)	0	5	10	20	50	100	200
current density (pA/pF)	9.34862	--	11.2294	17.6973	54.3211	137.55	152.165
	5.75207	--	9.95868	20.0248	69.6612	140.785	168.074
	8.35652	7.8	11.6261	34.5739	69.313	150.409	--
	7.22609	--	6.05217	9.10435	27.4087	87.5478	117.748

## Sheet: Fig 1G
Fig. 1G Clomipramine (LyNa-Va1.1) effects on whole-cell ITPC2-LL/AA and ITRPML1-4A
TPC2 wc	LyNa-VA1.1
	basal	100µM	ratio: LyNa-VA1.1/basal
current (pA)	136.1	1835.6	13.4871
	102.2	1904.2	18.6321
	79.2	1632.7	20.6149
	188.9	1290	6.82901
	129.1	1968.1	15.2448
TRPML1-4A wc	LyNa-VA1.1			ML-SA1 (20 mM)
	basal	100µM	ratio: LyNa-VA1.1/basal
current (pA)	62.6	28.1	0.448882
	84.8	29.7	0.350236
	123.6	114.4	0.925566	4274.3
	188.3	172.7	0.917153	5928.6
