# Supplementary material for: Agonist-specific voltage-dependent gating of lysosomal two-pore Na+ channels
Source: eLife. 2019 Dec 11;8:e51423. doi: 10.7554/eLife.51423 (PMC6905855; doi:10.7554/eLife.51423)
Supplement: Figure 2—figure supplement 2—source data 1. [file elife-51423-fig2-figsupp2-data1.xlsx]

## Sheet: Sheet1
Fig. 2-Suppl. 2C Agonist-specific voltage-dependent inactivation of ITPC2
I1s / 0s @-140mV
	LyNa-VA1.2	LyNa1
	0.09192	0.90862
	0.10975	1.04646
	0.14581	0.94093
mean	0.11583	0.96534
se	0.01585	0.04162
