# Supplementary material for: Agonist-specific voltage-dependent gating of lysosomal two-pore Na+ channels
Source: eLife. 2019 Dec 11;8:e51423. doi: 10.7554/eLife.51423 (PMC6905855; doi:10.7554/eLife.51423)
Supplement: Figure 2—source data 1. [file elife-51423-fig2-data1.xlsx]

## Sheet: Fig 2G & 2F
Fig. 2G The inactivation of ITPC2
I500ms / I10ms @-120mV
	Test1	Test2	Test3	Test4	Test5	mean	SE	n
pip2	1.00185	0.97628	0.99315	0.9868		0.98952	0.00538	4
lyNa-Va1.2	0.62426	0.74343	0.49022	0.59989	0.67584	0.62673	0.04207	5
LyNA1	0.90467	1.00339	0.9967	0.97385		0.96965	0.02257	4
Fig. 2F Rectification index of ITPC2
I+80mV/I-80mV
	Test1	Test2	Test3	Test4	Test5		mean	SE	n
pip2	0.84217	1.09616	1.05254	1.00139			0.99807	0.05545	4
lyNa-Va1.2	0.08266	0.04009	0.118	0.12174	0.15117	0.09959	0.10221	0.01557	6
LyNA1	0.90303	1.01973	0.91196	0.89528			0.9325	0.02928	4
