# Supplementary material for: Agonist-specific voltage-dependent gating of lysosomal two-pore Na+ channels
Source: eLife. 2019 Dec 11;8:e51423. doi: 10.7554/eLife.51423 (PMC6905855; doi:10.7554/eLife.51423)
Supplement: Figure 3—figure supplement 1—source data 1. [file elife-51423-fig3-figsupp1-data1.xlsx]

## Sheet: Sheet1
Fig.3 -suppl. 1E Dose-dependent activation of TPC2 by LyNA1
LyNA1+10nM PI(3,5)P2
Concentration (µM)
0	0.03818	4.35942e-05	6.32089e-05
10	0.03469	-0.13207	-0.16284
50	0.02967	-0.04581	-0.07904
100	0.38253	0.31967	0.06652
150	0.59522	0.53578	0.27132
300	0.94317	0.89922	0.9659
400	1	1.00341	1
LyNA1
Concentration (µM)
0	0.008	0.01	0.003	0.005	0	0
50	0.02084	0.03963		0.0267
100	0.13472	0.11657		0.20344	0.25795	0.10618
150	0.45533	0.50127	0.5031	0.75944		0.38818
300	0.93881				0.95425
400	0.97247	0.98838	0.98987	0.99345	0.99967	0.99207
