# Supplementary material for: Agonist-specific voltage-dependent gating of lysosomal two-pore Na+ channels
Source: eLife. 2019 Dec 11;8:e51423. doi: 10.7554/eLife.51423 (PMC6905855; doi:10.7554/eLife.51423)
Supplement: Figure 3—source data 1. [file elife-51423-fig3-data1.xlsx]

## Sheet: Sheet1
Fig. 3B Ratio of LyNa-VA1.2-induced ITPC2 to PI(3,5)P2-induced ITPC2 on WT and K204A
ILyNa-VA1.2 / IPI(3,5)P2
@-120mV						mean	se	n
WT	0.36122	0.24706	0.35088	0.20402		0.29079	0.03874	4
R204A	8.38507	10.2619	17.2296			11.9589	2.6905	3
Fig. 3C The synergistic effects of PI(3,5)P2 (50 nM) and LyNa-VA1.1
Normalized I-TPC2
WT TPC2 LyNa-VA1.1 + PI(3,5)P2 50nM
concentration (µM )						mean	se	n
0	0.41667	0.2955	0.12222			0.27813	0.08544	3
1	0.3375	0.15676	0.08956			0.1946	0.07403	3
3	0.35	0.30631	0.1			0.2521	0.07709	3
10	0.55583	0.72523	0.28889			0.52332	0.127	3
30	1	1	0.32222			0.77407	0.22593	3
100	0.74167	0.74234	1			0.828	0.086	3
WT TPC2 LyNa-VA1.1
concentration (µM )						mean	se	n
0	0.03017	0.08557	0.30961			0.14179	0.08542	3
10	0.08625	0.14268	0.18446			0.1378	0.02846	3
20	0.24192	0.18035	0.11684			0.17971	0.03611	3
50	0.84726	0.45347	0.58926			0.63	0.11549	3
100	1	1	0.99			0.99667	0.00333	3
200	0.71055	0.50701	0.65451			0.62402	0.0607	3
TPC2-K204A LyNa-VA1.1 + PI(3,5)P2 50nM
concentration (µM )						mean	se	n
0	0.24983	0.08387	0.05339			0.12903	0.06104	3
1	0.01018	0.10534	0.13474			0.08342	0.03759	3
3	-0.08987	0.10726	0.21834			0.07858	0.09012	3
10	-0.1017	0.17668	0.25941			0.11147	0.10922	3
30	0.11895	0.29724	0.33265			0.24961	0.06612	3
100	0.84683	1	1			0.94894	0.05106	3
200	1	0.5762	0.91444			0.83021	0.12939	3
TPC2-K204A LyNa-VA1.1
concentration (µM )						mean	se	n
0	0.07463	0.0256	0.00296			0.0344	0.02115	3
10	0.02985	0.03877	0.00366			0.02409	0.01054	3
20	0.03731	0.1741	0.01903			0.07682	0.04893	3
50	0.27363	0.42625	0.38982			0.36324	0.04602	3
100	0.86567	1	0.79209			0.88592	0.06087	3
200	1	0.84921	1			0.94974	0.05026	3
Fig. 3D EC50 of LyNa-VA1.1 with or without PI(3,5)P2 in WT and K204A
EC50	WT-pip2	WT+pip2	K204A -pip2	K204A+pip2
	56	27	56.4	45.5
	48.4	12.6	68.2	56.2
	30.8	4.3	54.5	44.4
MEAN	45.0667	14.6333	59.7	48.7
SE	7.46309	6.63132	4.28525	3.76342
Fig. 3G LyNa-VA1.1 effects on whole-endolysome ITPC in WT and TPC1/2 DKO cells
	current(pA )					mean	se	n
wt	basal	5.8	24.3	9.6	8.9	12.15	4.1333	4
wt	LyNa-VA1.1	252.1	207.1	321.7	271.3	263.05	23.7315	4
dko	basal	14.3	10.7	33.6	18.3	19.225	5.03676	4
dko	LyNa-VA1.1	15.3	12.5	24.7	10.4	15.725	3.15552	4
