# Supplementary material for: Agonist-specific voltage-dependent gating of lysosomal two-pore Na+ channels
Source: eLife. 2019 Dec 11;8:e51423. doi: 10.7554/eLife.51423 (PMC6905855; doi:10.7554/eLife.51423)
Supplement: Figure 4—source data 1. [file elife-51423-fig4-data1.xlsx]

## Sheet: Sheet1
Fig. 4C Rectification index of basal and LyNa-VA1.1-induced ITPC1
I+80mV/I-80mV
	Test1	Test2	Test3	Test4	Test5	mean	SE	n
Basal	4.27893	7.34356	4.85404	8.96372	7.59722	6.60749	0.88232	5
LyNaV1.1	0.23403	0.09066	0.13542	0.38542		0.21138	0.06529	4
Fig. 4D Does-dependent activation or inhibition of TPC1 by LyNa-VAs
LyNa-VA1.1 (µM )					mean	SE
0	0.00401	0	0.01138		0.00513	0.00333
3	0.0359	0.10499	0		0.04696	0.03081
10	0.17223	0.1955	0.12084		0.16286	0.02205
30	0.60406	0.31783	0.39825		0.44005	0.08523
100	1	0.70308	0.86375		0.85561	0.08581
300	0.80715	1	1		0.93572	0.06428
LyNa-VA1.2 (µM)
0	0.07047	0.00953	0.00364		0.02788	0.02136
3	0.01236	0.1007	0.11291		0.07532	0.03168
10	0.39045	0.60133	0.29816		0.42998	0.08972
30	0.97562	1	0.75668		0.91077	0.07736
100	1	0.51803	1		0.83934	0.16066
300	0.92986	--	0.72734		0.8286	0.10126
LyNa-VA2.1 (µM)
0	1	1	1		1	0
3	0.90837	0.9958	1.02749		0.97722	0.03562
10	0.85466	1.00315	0.87628		0.91136	0.04632
30	0.86166	0.80599	0.51936		0.729	0.10604
100	0.49944	0.41034	0.291		0.40026	0.06038
300	0.19702	0.08086	0.12139		0.13309	0.03404
Fig. 4F The effects of LyNa-VA1.1 on the G-V curves of ITPC1
Basal
Vm	G/Gmax	G/Gmax	G/Gmax	G/Gmax	G/Gmax	G/Gmax		mean	se
-140	0.04549	0.02728	0.0723	--	--	0.00882		0.03847	0.01353
-120	0.04269	0.02897	0.07735	0.08027	0.06367	0.0097		0.05044	0.0115
-100	0.04549	0.03368	0.06572	0.07905	0.06864	0.00882		0.05023	0.01068
-80	0.03989	0.04045	0.09302	0.07322	0.07445	0.0097		0.05512	0.01245
-60	0.04619	0.04779	0.12285	0.07146	0.11842	0.0142		0.07015	0.01762
-40	0.05178	0.08278	0.20576	0.09614	0.13397	0.03194		0.1004	0.02557
-20	0.08118	0.14751	0.26744	0.11132	0.20095	0.07084		0.14654	0.031
0	0.14206	0.30574	0.44843	0.17112	0.30278	0.15536		0.25425	0.04899
20	0.25892	0.52531	0.52022	0.30549	0.47719	0.28972		0.39614	0.05067
40	0.41638	0.81486	0.78766	0.47051	0.61779	0.4532		0.5934	0.07153
60	0.60182	1	0.82053	0.6278	0.73849	0.64243		0.73851	0.06199
80	0.81106	0.92267	0.94085	0.76922	0.88988	0.75545		0.84819	0.0327
100	1	0.93603	1	0.90807	0.96495	0.8547		0.94396	0.02312
120				1	1	0.95227		0.98409	0.01591
140						1
LyNa-Va1.1
Vm	G/Gmax	G/Gmax	G/Gmax	G/Gmax				mean	se
-140	0.07865	0.02492	0.03884	0.11792				0.06508	0.02097
-120	0.05158	0.02421	0.04613	0.11483				0.05919	0.01947
-100	0.07099	0.03097	0.05275	0.10453				0.06481	0.01556
-80	0.12053	0.08081	0.10682	0.1174				0.10639	0.00902
-60	0.24004	0.20541	0.22666	0.16581				0.20948	0.01621
-40	0.42135	0.39587	0.47495	0.28527				0.39436	0.03992
-20	0.59142	0.61303	0.70051	0.46601				0.59274	0.04838
0	0.78703	0.78925	0.89362	0.67147				0.78534	0.04538
20	0.8667	0.90032	0.9733	0.77652				0.87921	0.04082
40	0.97089	0.94055	0.9936	0.90731				0.95309	0.01873
60	0.99642	1	1	0.9897				0.99653	0.00243
80	0.98672	0.97793	0.97462	0.98198				0.98031	0.00261
100	1		0.96204	1				0.98735	0.01265
