# Supplementary material for: Agonist-specific voltage-dependent gating of lysosomal two-pore Na+ channels
Source: eLife. 2019 Dec 11;8:e51423. doi: 10.7554/eLife.51423 (PMC6905855; doi:10.7554/eLife.51423)
Supplement: Figure 5—figure supplement 1—source data 1. [file elife-51423-fig5-figsupp1-data1.xlsx]

## Sheet: Sheet1
Fig. 5-suppl. 1B Cationic selectivity of LyNA1-induced ITPC2
LyNA1
Px/PNa+
Na+	K+	Ca2+
0.83925	0.05625	0.09045
1.00782	0.0959	0.10261
0.97462	0.10408	0.10217
		0.09007
