# Supplementary material for: Agonist-specific voltage-dependent gating of lysosomal two-pore Na+ channels
Source: eLife. 2019 Dec 11;8:e51423. doi: 10.7554/eLife.51423 (PMC6905855; doi:10.7554/eLife.51423)
Supplement: Figure 5—source data 1. [file elife-51423-fig5-data1.xlsx]

## Sheet: Sheet1
Fig. 5K Na+ vs. K+ /Ca2+ selectivity of WT and N653G
TPC2	WT			WT			WT			N653G
PX / PNa	Na+			K+			Ca2+			K+
	PI(3,5)P2	LyNa-VA		PI(3,5)P2	LyNa-VA		PI(3,5)P2	LyNa-VA		PI(3,5)P2	LyNa-VA
	0.99209	1		0.02921	0.09237		0.016	0.02		0.50921	0.55758
	1.10434	0.98425		0.09237	0.11265		0.016	0.016		0.60274	0.62668
	1	1.12648		0.08877	0.0621		0.034	0.011		0.4961	0.33608
				0.01887						0.39273	0.4961
mean	1.03214	1.03691		0.05731	0.08904		0.022	0.01567		0.50019	0.50411
se	0.03617	0.04502		0.01933	0.01469		0.006	0.0026		0.04298	0.06204
