# Supplementary material for: Agonist-specific voltage-dependent gating of lysosomal two-pore Na+ channels
Source: eLife. 2019 Dec 11;8:e51423. doi: 10.7554/eLife.51423 (PMC6905855; doi:10.7554/eLife.51423)
Supplement: Table 1—source data 1. [file elife-51423-table1-data1.xlsx]

## Sheet: Whole Cell
Table 1 LyNaV dose dependent activation of TPC2 in whole cell recordings
	LyNa-VA1.1
concentration (µM)	0	10	20	50	100	200
current density (pA/pF)	11.5339	14.2797	16.3729	72.1017	144.729	155.559
	8.44628	--	26.1322	73.3967	150.116	157.372
	7.84158	--	46.3465	148.386	200.812	161.653
	16.4261	27.1739	35.0522	75.6	111.696	112.174
	LyNa-VA1.2
concentration (µM)	0	5	10	20	50	100	200	400
current density (pA/pF)	12.5124	10.3471	14.5785	24.0331	89.8595	240.859	297.455	--
	6.56637	4.75221	6.45133	8.69912	25.0088	94.6372	239.381	245.487
	3.42453	3.36792	2.84906	7.08491	25.4245	96.3302	181.434	193.066
	5.57391	5.88696	8.54783	17.3826	76.3478	256.8	429.652	464.052
	LyNa-VA1.3
concentration (µM)	0	5	10	20	50	100	200	400
current density (pA/pF)	4.10909	--	4.66364	6.51818	14.1182	42.3	99.9	103.264
	23.2727	--	36.5364	56.7909	126.618	158.945	167.955	--
	7.6	--	8.18182	7.65455	15.6182	32.4364	41.0364	--
	LyNa-VA1.4
concentration (µM)	0	5	10	20	50	100	200	400
current density (pA/pF)	6.54545	--	7.73636	11.0727	26.9364	95.0727	156.364	--
	8.32727	--	9.04545	11.9545	36.5091	115.527	155.436	--
	7.04545	--	6.65455	11.2909	23.5818	80.9273	160.382	179.973
	13.8455	12.4	9.46364	11.6545	26.8545	83.2	158.109	--
	LyNa-VA1.5
concentration (µM)	0	5	10	20	50	100	200	400
current density (pA/pF)	7.54545	--	7.1	6.77273	14.0091	57.6545	154.282	180.164
	12.8727	--	35.8727	73.7727	121.209	164.355	191.036
	5.67273	--	7.33636	24.3182	89.9	160.345	204.236
	12.5091	--	16.5636	--	--	75.7909	114.582
	Carbamazepine
concentration (µM)	0	5	10	20	50	100	200	400
current density (pA/pF)	7.81818	8.01818	8.22727	8.57273	8.8	7.69091	7.46364	8.10909
	9.10909	9.07273	9.22727	9.16364	8.75455	8.97273	9.85455	8.75455
	5.94545	6.64545	5.43636	6.41818	6.07273	5.51818	6.16364	7.1
	LyNa-VA2.1
concentration (µM)	0	5	10	20	50	100	200
current density (pA/pF)	9.34862	--	11.2294	17.6973	54.3211	137.55	152.165
	5.75207	--	9.95868	20.0248	69.6612	140.785	168.074
	8.35652	7.8	11.6261	34.5739	69.313	150.409	--
	7.22609	--	6.05217	9.10435	27.4087	87.5478	117.748
	LyNa-VA2.2
concentration (µM)	0	5	10	20	50	100	200
current density (pA/pF)	3.43636	--	5.82727	9.37273	33.1545	125.791	155.109
	2.03636	--	3.64545	9.13636	26.4182	49.7455	66.0091
	2.95455	--	3	3.48182	44.2909	115.618	133.127
	Phenothiazine
concentration (µM)	0	5	10	20	50	100	200
current density (pA/pF)	12.0727	--	10.2273	11.0091	10.7545	9.9	10.0545
	8.97273	--	10.0273	7.50909	9.7	8.06364	9.21818
	11.1091	--	9.7	8.93636	10.2182	9.88182	9.55455

## Sheet: Whole Endolysosome
Whole endo-lysosomal TPC2 current activated by LyNa-VAs(100uM)
	Test 1	Test 2	Test 3	Test 4	Test 5	mean	se	n
LyNa-VA1.1/clomipramine	1273.8	877	1102.3	631.7	838.6	944.68	111.12	5
LyNa-VA1.2/desipramine	871.6	1128.2	1154.5	1326.4		1120.17	93.7909	4
LyNa-VA1.3/imipramine	621.3	343.9	334.8			433.333	94.02	3
LyNa-VA1.4/amitriptyline	917.1	1193.5	517.6			876.067	196.191	3
LyNa-VA1.5/nortriptyline	1814.6	1075.1	1937.9	2836.3		1915.97	361.112	4
Carbamazepine	-17	9.3	23.1			5.13333	11.7619	3
LyNa-VA2.1/chlorpromazine	1013.4	2019.9	268.2			1100.5	507.544	3
LyNa-VA2.2/triflupromazine	1572	698	681.2			983.733	294.173	3
Phenothiazine	10.3	-2.6	4.8			4.16667	3.73735	3

## Sheet: Premilinary Screening
Summary of preliminary electrophysiological test of positive LOPAC hits
Chemical Name	Registration ID	I-TPC2 (pA) #
Clomipramine	NCGC00015264-13	>1500
Protriptyline hydrochloride	NCGC00015851-10	~1000
Amitriptyline hydrochloride	NCGC00015095-15	~1000
Chlorpromazine hydrochloride	NCGC00015273-02	>1500
Triflupromazine hydrochloride	NCGC00016012-12	>1500
Tyrphostin AG 879	NCGC00016007-13	No activation
Niclosamide	NCGC00015735-11	No activation
Nomifensine maleate	NCGC00015727-10	No activation
Escitalopram	NCGC00015267-17	No activation
Loperamide	NCGC00015608-11	No activation
Quinacrine dihydrochloride dihydrate	NCGC00015874-05	No activation
Guanfacine hydrochloride	NCGC00015469-09	No activation
n-Bromoacetamide	NCGC00015145-02	No activation
N,N,N-Trimethyl-4-(2-oxopyrrolidin-1-yl) but-2-yn-1-aminium	NCGC00015758-05	No activation
Tyrphostin B42	NCGC00016014-19	No activation
Bethanechol chloride	NCGC00015245-10	No activation
Carbachol	NCGC00015237-07	No activation
Arecoline	NCGC00015075-10	No activation
Methacholine chloride	NCGC00015045-09	No activation
Arecaidine propargyl ester	NCGC00015006-05	No activation
4-N-(1-Benzylindazol-5-yl)-6-N,6-N-dimethylpyrido[3,4-d]pyrimidine-4,6-diamine	NCGC00015468-06	No activation
Muscarine	NCGC00162278-04	No activation
Propafenone	NCGC00015819-15	No activation
# Whole-cell currents of TPC2 were tested in HEK293 cells overexpressing TPC2 LL/AA.
A total of 23 hits from LOPAC1280 HTS, which selectively increased Ca2+ signals in TPC2 stable cells, but not in TPRML1 stable cells, were further tested using whole-cell recordings in TPC2LL/AA –expressing HEK293 cells. Whole-cell ITPC2 was elicited with a voltage ramp from -140 to +100 mV (duration = 200 ms). ITPC2 was measured at -140 mV, and positive responses were highlighted in red.
